# Supplementary material for: Clonal Expansion of Early to Mid-Life Mitochondrial DNA Point Mutations Drives Mitochondrial Dysfunction during Human Ageing
Source: PubMed Central journal article supplement (PMC4169240; doi:10.1371/journal.pgen.1004620), 2014-09-18
Supplement: pgen.1004620.s002.pdf [file pgen.1004620.s002.pdf]

Table S1: Random Mutation Capture raw data

| Subject | Age | Copy number | Total Mutations | Mutation Frequency | 6562 T>C | 6562 T>A | 6562 T>G | 6563 C>A | 6563 C>G | 6563 C>T | 6564 G>A | 6564 G>C | 6564 G>T | 6565 A>C | 6565 A>G | 6565 A>T | Ins | Del |
|---------|-----|-------------|-----------------|--------------------|----------|----------|----------|----------|----------|----------|----------|----------|----------|----------|----------|----------|-----|-----|
| BCC001  | 29  | 241951      | 0               | 0                  | 0        | 0        | 0        | 0        | 0        | 0        | 0        | 0        | 0        | 0        | 0        | 0        | 0   | 0   |
| BCC004  | 70  | 419672      | 4               | 9.53125E-06        | 2        | 0        | 0        | 0        | 0        | 0        | 0        | 0        | 2        | 0        | 0        | 0        | 0   | 0   |
| BCC005  | 30  | 565758      | 0               | 0                  | 0        | 0        | 0        | 0        | 0        | 0        | 0        | 0        | 0        | 0        | 0        | 0        | 0   | 0   |
| BCC007  | 35  | 216216      | 0               | 0                  | 0        | 0        | 0        | 0        | 0        | 0        | 0        | 0        | 0        | 0        | 0        | 0        | 0   | 0   |
| BCC008  | 62  | 902582      | 3               | 3.3238E-06         | 0        | 0        | 0        | 1        | 0        | 0        | 1        | 0        | 0        | 0        | 1        | 0        | 0   | 0   |
| BCC010  | 46  | 1175608     | 1               | 8.50624E-07        | 0        | 0        | 0        | 0        | 0        | 0        | 1        | 0        | 0        | 0        | 0        | 0        | 0   | 0   |
| BCC011  | 52  | 1316285     | 1               | 7.59714E-07        | 0        | 0        | 0        | 0        | 0        | 0        | 0        | 0        | 0        | 0        | 1        | 0        | 0   | 0   |
| BCC012  | 68  | 585337      | 0               | 0                  | 0        | 0        | 0        | 0        | 0        | 0        | 0        | 0        | 0        | 0        | 0        | 0        | 0   | 0   |
| BCC013  | 55  | 647954      | 1               | 1.54332E-06        | 0        | 0        | 0        | 0        | 0        | 0        | 1        | 0        | 0        | 0        | 0        | 0        | 0   | 0   |
| BCC014  | 40  | 120296      | 3               | 2.49385E-05        | 0        | 0        | 0        | 0        | 0        | 0        | 3        | 0        | 0        | 0        | 0        | 0        | 0   | 0   |
| BCC015  | 42  | 116424      | 3               | 2.57679E-05        | 0        | 0        | 0        | 0        | 0        | 1        | 0        | 0        | 2        | 0        | 0        | 0        | 0   | 0   |
| BCC017  | 45  | 1360432     | 0               | 0                  | 0        | 0        | 0        | 0        | 0        | 0        | 0        | 0        | 0        | 0        | 0        | 0        | 0   | 0   |
| BCC019  | 39  | 305096      | 0               | 0                  | 0        | 0        | 0        | 0        | 0        | 0        | 0        | 0        | 0        | 0        | 0        | 0        | 0   | 0   |
| BCC021  | 74  | 340768      | 17              | 4.98873E-05        | 0        | 0        | 0        | 0        | 0        | 0        | 17       | 0        | 0        | 0        | 0        | 0        | 0   | 0   |
| BCC022  | 60  | 794205      | 2               | 2.51824E-06        | 0        | 0        | 0        | 1        | 0        | 0        | 0        | 0        | 0        | 0        | 0        | 0        | 0   | 1   |
| BCC023  | 66  | 708747      | 1               | 1.41094E-06        | 0        | 0        | 0        | 1        | 0        | 0        | 0        | 0        | 0        | 0        | 0        | 0        | 0   | 0   |
| BCC024  | 50  | 3048056     | 12              | 3.93694E-06        | 8        | 0        | 0        | 0        | 0        | 0        | 0        | 0        | 0        | 0        | 3        | 1        | 0   | 0   |
| BCC025  | 63  | 1226169     | 3               | 2.44664E-06        | 0        | 0        | 0        | 0        | 0        | 0        | 2        | 0        | 1        | 0        | 0        | 0        | 0   | 0   |
| BCC027  | 49  | 349448      | 7               | 2.00316E-05        | 0        | 0        | 0        | 0        | 0        | 3        | 2        | 0        | 1        | 0        | 1        | 0        | 0   | 0   |
| BCC028  | 48  | 732463      | 0               | 0                  | 0        | 0        | 0        | 0        | 0        | 0        | 0        | 0        | 0        | 0        | 0        | 0        | 0   | 0   |
| BCC029  | 68  | 496584      | 2               | 4.02752E-06        | 0        | 0        | 0        | 0        | 0        | 1        | 0        | 0        | 0        | 0        | 1        | 0        | 0   | 0   |
| BCC030  | 65  | 600072      | 4               | 6.66587E-06        | 0        | 0        | 0        | 0        | 0        | 1        | 1        | 0        | 0        | 0        | 2        | 0        | 0   | 0   |
| BCC031  | 42  | 778800      | 4               | 5.13611E-06        | 0        | 0        | 0        | 0        | 0        | 0        | 3        | 0        | 1        | 0        | 0        | 0        | 0   | 0   |
| BCC032  | 56  | 161832      | 4               | 2.4717E-05         | 2        | 0        | 0        | 0        | 0        | 0        | 1        | 0        | 0        | 0        | 1        | 0        | 0   | 0   |
| BCC033  | 55  | 238832      | 1               | 4.18704E-06        | 0        | 0        | 0        | 0        | 0        | 0        | 0        | 0        | 1        | 0        | 0        | 0        | 0   | 0   |
| BCC044  | 72  | 450523      | 1               | 2.21964E-06        | 0        | 0        | 0        | 0        | 0        | 0        | 0        | 0        | 0        | 0        | 1        | 0        | 0   | 0   |
| BCC046  | 52  | 1139160     | 8               | 7.02272E-06        | 0        | 0        | 0        | 0        | 0        | 0        | 5        | 0        | 1        | 0        | 2        | 0        | 0   | 0   |
| BCC047  | 76  | 249304      | 7               | 2.80782E-05        | 1        | 0        | 0        | 0        | 0        | 0        | 2        | 0        | 4        | 0        | 0        | 0        | 0   | 0   |
| BCC048  | 60  | 209176      | 4               | 1.91227E-05        | 0        | 0        | 0        | 0        | 0        | 0        | 3        | 0        | 0        | 0        | 0        | 0        | 0   | 1   |
| BCC049  | 45  | 1041392     | 3               | 2.88076E-06        | 0        | 0        | 0        | 0        | 0        | 0        | 1        | 0        | 1        | 0        | 1        | 0        | 0   | 0   |
| BCC055  | 61  | 765160      | 7               | 9.14841E-06        | 0        | 0        | 0        | 0        | 0        | 1        | 5        | 0        | 0        | 0        | 1        | 0        | 0   | 0   |
| BCC056  | 49  | 914732      | 7               | 7.65251E-06        | 1        | 0        | 0        | 0        | 0        | 1        | 5        | 0        | 0        | 0        | 0        | 0        | 0   | 0   |
| BCC057  | 47  | 436656      | 3               | 6.8704E-06         | 0        | 0        | 0        | 0        | 0        | 0        | 2        | 0        | 1        | 0        | 0        | 0        | 0   | 0   |
| BCC058  | 43  | 556160      | 0               | 0                  | 0        | 0        | 0        | 0        | 0        | 0        | 0        | 0        | 0        | 0        | 0        | 0        | 0   | 0   |
| BCC059  | 47  | 484440      | 0               | 0                  | 0        | 0        | 0        | 0        | 0        | 0        | 0        | 0        | 0        | 0        | 0        | 0        | 0   | 0   |
| BCC060  | 72  | 161119      | 0               | 0                  | 0        | 0        | 0        | 0        | 0        | 0        | 0        | 0        | 0        | 0        | 0        | 0        | 0   | 0   |
| BCC061  | 43  | 428912      | 1               | 2.33148E-06        | 0        | 0        | 0        | 0        | 0        | 0        | 0        | 0        | 0        | 0        | 1        | 0        | 0   | 0   |
| BCC062  | 48  | 788040      | 1               | 1.26897E-06        | 0        | 0        | 0        | 0        | 0        | 0        | 0        | 0        | 0        | 0        | 1        | 0        | 0   | 0   |
| BCC063  | 42  | 2572064     | 3               | 1.16638E-06        | 0        | 0        | 0        | 0        | 0        | 1        | 2        | 0        | 0        | 0        | 0        | 0        | 0   | 0   |
| BCC064  | 38  | 1023352     | 1               | 9.77181E-07        | 0        | 0        | 0        | 0        | 0        | 0        | 1        | 0        | 0        | 0        | 0        | 0        | 0   | 0   |
| BCC065  | 43  | 1245552     | 1               | 8.02857E-07        | 1        | 0        | 0        | 0        | 0        | 0        | 0        | 0        | 0        | 0        | 0        | 0        | 0   | 0   |
| BCC066  | 32  | 2181960     | 0               | 0                  | 0        | 0        | 0        | 0        | 0        | 0        | 0        | 0        | 0        | 0        | 0        | 0        | 0   | 0   |
| BCC067  | 57  | 461120      | 1               | 2.16863E-06        | 0        | 0        | 0        | 0        | 0        | 0        | 0        | 0        | 0        | 0        | 1        | 0        | 0   | 0   |
| BCC068  | 18  | 1926760     | 2               | 1.03801E-06        | 0        | 0        | 0        | 0        | 0        | 0        | 1        | 0        | 0        | 0        | 1        | 0        | 0   | 0   |
| BCC069  | 66  | 332200      | 0               | 0                  | 0        | 0        | 0        | 0        | 0        | 0        | 0        | 0        | 0        | 0        | 0        | 0        | 0   | 0   |
| BCC070  | 42  | 775104      | 1               | 1.29015E-06        | 0        | 0        | 0        | 0        | 0        | 0        | 0        | 0        | 0        | 0        | 1        | 0        | 0   | 0   |
| BCC071  | 66  | 2161280     | 2               | 9.25378E-07        | 1        | 0        | 0        | 0        | 0        | 0        | 0        | 0        | 0        | 0        | 1        | 0        | 0   | 0   |
| BCC072  | 67  | 1618936     | 2               | 1.23538E-06        | 1        | 0        | 0        | 0        | 0        | 0        | 1        | 0        | 0        | 0        | 0        | 0        | 0   | 0   |

| Subject | Age | Copy number | Total Mutations | Mutation Frequency | 6562 T>C | 6562 T>A | 6562 T>G | 6563 C>A | 6563 C>G | 6563 C>T | 6564 G>A | 6564 G>C | 6564 G>T | 6565 A>C | 6565 A>G | 6565 A>T | Ins | Del |
|---------|-----|-------------|-----------------|--------------------|----------|----------|----------|----------|----------|----------|----------|----------|----------|----------|----------|----------|-----|-----|
| BCC073  | 38  | 1437216     | 0               | 0                  | 0        | 0        | 0        | 0        | 0        | 0        | 0        | 0        | 0        | 0        | 0        | 0        | 0   | 0   |
| BCC075  | 52  | 2147640     | 4               | 1.86251E-06        | 0        | 0        | 0        | 0        | 0        | 0        | 1        | 0        | 0        | 0        | 3        | 0        | 0   | 0   |
| BCC076  | 58  | 419848      | 1               | 2.38181E-06        | 0        | 0        | 0        | 0        | 0        | 0        | 0        | 0        | 0        | 0        | 0        | 0        | 0   | 1   |
| BCC077  | 40  | 1029096     | 8               | 7.77381E-06        | 0        | 0        | 0        | 0        | 0        | 1        | 5        | 1        | 0        | 0        | 1        | 0        | 0   | 0   |
| BCC078  | 60  | 745160      | 2               | 2.68399E-06        | 1        | 0        | 0        | 0        | 0        | 0        | 1        | 0        | 0        | 0        | 0        | 0        | 0   | 0   |
| BCC079  | 40  | 1067019     | 11              | 1.03091E-05        | 7        | 0        | 0        | 0        | 0        | 1        | 0        | 0        | 1        | 0        | 2        | 0        | 0   | 0   |
| BCC080  | 45  | 4787782     | 8               | 1.67092E-06        | 1        | 0        | 0        | 0        | 0        | 0        | 4        | 0        | 0        | 0        | 3        | 0        | 0   | 0   |
| BCC081  | 36  | 131572      | 2               | 1.52008E-05        | 0        | 0        | 0        | 0        | 0        | 0        | 1        | 0        | 0        | 0        | 1        | 0        | 0   | 0   |
| BCC082  | 59  | 550669      | 0               | 0                  | 0        | 0        | 0        | 0        | 0        | 0        | 0        | 0        | 0        | 0        | 0        | 0        | 0   | 0   |
| BCC083  | 45  | 433288      | 1               | 2.30793E-06        | 0        | 0        | 0        | 0        | 0        | 0        | 0        | 0        | 0        | 0        | 0        | 0        | 0   | 1   |
| BCC084  | 52  | 1046280     | 0               | 0                  | 0        | 0        | 0        | 0        | 0        | 0        | 0        | 0        | 0        | 0        | 0        | 0        | 0   | 0   |
| BCC085  | 51  | 5135368     | 6               | 1.16837E-06        | 2        | 0        | 0        | 1        | 0        | 0        | 2        | 0        | 1        | 0        | 0        | 0        | 0   | 0   |
| BCC086  | 63  | 629702      | 0               | 0                  | 0        | 0        | 0        | 0        | 0        | 0        | 0        | 0        | 0        | 0        | 0        | 0        | 0   | 0   |
| BCC087  | 64  | 703448      | 0               | 0                  | 0        | 0        | 0        | 0        | 0        | 0        | 0        | 0        | 0        | 0        | 0        | 0        | 0   | 0   |
| BCC088  | 57  | 958437      | 2               | 2.08673E-06        | 0        | 0        | 0        | 0        | 0        | 1        | 0        | 0        | 1        | 0        | 0        | 0        | 0   | 0   |
| BCC096  | 66  | 431637      | 8               | 1.85341E-05        | 4        | 0        | 0        | 1        | 0        | 0        | 3        | 0        | 0        | 0        | 0        | 0        | 0   | 0   |
| BCC097  | 41  | 420200      | 1               | 2.37982E-06        | 0        | 0        | 0        | 0        | 0        | 0        | 1        | 0        | 0        | 0        | 0        | 0        | 0   | 0   |
| BCC098  | 17  | 396000      | 1               | 2.52525E-06        | 0        | 0        | 0        | 0        | 0        | 0        | 1        | 0        | 0        | 0        | 0        | 0        | 0   | 0   |
| BCC099  | 59  | 338888      | 3               | 8.85248E-06        | 1        | 0        | 0        | 0        | 0        | 0        | 0        | 0        | 2        | 0        | 0        | 0        | 0   | 0   |
| BCC100  | 52  | 317504      | 4               | 1.25983E-05        | 1        | 0        | 0        | 0        | 0        | 0        | 2        | 0        | 1        | 0        | 0        | 0        | 0   | 0   |
| BCC101  | 62  | 574816      | 8               | 1.39175E-05        | 2        | 0        | 0        | 0        | 0        | 0        | 3        | 0        | 1        | 0        | 2        | 0        | 0   | 0   |
| BCC102  | 59  | 106304      | 6               | 5.64419E-05        | 1        | 0        | 0        | 0        | 0        | 0        | 0        | 0        | 5        | 0        | 0        | 0        | 0   | 0   |
| BCC103  | 51  | 204512      | 13              | 6.3566E-05         | 0        | 0        | 0        | 0        | 0        | 0        | 10       | 0        | 1        | 0        | 1        | 1        | 0   | 0   |
| BCC104  | 42  | 577544      | 6               | 1.03888E-05        | 0        | 0        | 0        | 1        | 0        | 1        | 2        | 0        | 2        | 0        | 0        | 0        | 0   | 0   |
| BCC106  | 27  | 1109152     | 6               | 5.40954E-06        | 1        | 0        | 0        | 0        | 0        | 0        | 5        | 0        | 0        | 0        | 0        | 0        | 0   | 0   |
| BCC107  | 55  | 736553      | 9               | 1.22191E-05        | 0        | 0        | 0        | 0        | 0        | 1        | 0        | 0        | 0        | 0        | 8        | 0        | 0   | 0   |
| BCC108  | 58  | 2140160     | 6               | 2.80353E-06        | 1        | 0        | 0        | 0        | 0        | 0        | 1        | 0        | 3        | 0        | 1        | 0        | 0   | 0   |
| BCC109  | 73  | 208120      | 8               | 3.84394E-05        | 0        | 0        | 0        | 0        | 0        | 0        | 8        | 0        | 0        | 0        | 0        | 0        | 0   | 0   |
| BCC110  | 24  | 174240      | 4               | 2.29568E-05        | 1        | 0        | 0        | 1        | 0        | 0        | 1        | 1        | 0        | 0        | 0        | 0        | 0   | 0   |
| BCC111  | 63  | 1063216     | 4               | 3.76217E-06        | 0        | 0        | 0        | 1        | 0        | 0        | 3        | 0        | 0        | 0        | 0        | 0        | 0   | 0   |
| BCC112  | 25  | 1580040     | 3               | 1.89869E-06        | 0        | 0        | 0        | 0        | 0        | 0        | 2        | 0        | 0        | 0        | 1        | 0        | 0   | 0   |
| BCC113  | 78  | 122879      | 2               | 1.62762E-05        | 0        | 0        | 0        | 0        | 0        | 0        | 2        | 0        | 0        | 0        | 0        | 0        | 0   | 0   |
| BCC114  | 58  | 1373064     | 3               | 2.18489E-06        | 0        | 0        | 0        | 0        | 0        | 0        | 2        | 0        | 0        | 0        | 0        | 0        | 0   | 1   |
| BCC115  | 51  | 680152      | 5               | 7.3513E-06         | 0        | 0        | 0        | 0        | 0        | 0        | 1        | 0        | 0        | 0        | 0        | 0        | 0   | 4   |
| BCC116  | 41  | 334664      | 7               | 2.09165E-05        | 0        | 0        | 0        | 1        | 0        | 0        | 5        | 0        | 0        | 0        | 1        | 0        | 0   | 0   |
| BCC117  | 25  | 486384      | 8               | 1.64479E-05        | 2        | 0        | 0        | 0        | 0        | 0        | 1        | 0        | 0        | 0        | 5        | 0        | 0   | 0   |
| BCC118  | 63  | 466830      | 7               | 1.49947E-05        | 1        | 0        | 0        | 0        | 0        | 0        | 2        | 0        | 1        | 0        | 3        | 0        | 0   | 0   |
| BCC119  | 68  | 482405      | 3               | 6.21884E-06        | 0        | 0        | 0        | 1        | 0        | 1        | 0        | 0        | 0        | 0        | 1        | 0        | 0   | 0   |
| BCC120  | 32  | 671375      | 1               | 1.48948E-06        | 0        | 0        | 0        | 0        | 0        | 0        | 1        | 0        | 0        | 0        | 0        | 0        | 0   | 0   |
| BCC121  | 40  | 699938      | 0               | 0                  | 0        | 0        | 0        | 0        | 0        | 0        | 0        | 0        | 0        | 0        | 0        | 0        | 0   | 0   |
| BCC122  | 37  | 535420      | 5               | 9.33846E-06        | 0        | 0        | 0        | 0        | 0        | 0        | 2        | 0        | 1        | 0        | 1        | 0        | 0   | 1   |
| BCC123  | 50  | 449020      | 11              | 2.44978E-05        | 0        | 0        | 0        | 0        | 0        | 0        | 6        | 0        | 2        | 0        | 0        | 0        | 0   | 3   |
| BCC124  | 51  | 661545      | 1               | 1.51161E-06        | 0        | 0        | 0        | 0        | 0        | 0        | 0        | 0        | 1        | 0        | 0        | 0        | 0   | 0   |
| BCC125  | 49  | 606984      | 5               | 8.23745E-06        | 0        | 0        | 0        | 1        | 0        | 1        | 3        | 0        | 0        | 0        | 0        | 0        | 0   | 0   |
| BCC126  | 43  | 603530      | 1               | 1.65692E-06        | 0        | 0        | 0        | 0        | 0        | 0        | 0        | 0        | 0        | 0        | 0        | 0        | 1   | 0   |
| BCC127  | 47  | 415773      | 1               | 2.40516E-06        | 0        | 0        | 0        | 0        | 0        | 0        | 1        | 0        | 0        | 0        | 0        | 0        | 0   | 0   |
| BCC128  | 59  | 869051      | 3               | 3.45204E-06        | 0        | 0        | 0        | 0        | 0        | 1        | 1        | 0        | 0        | 0        | 0        | 0        | 0   | 1   |
| BCC129  | 49  | 548732      | 1               | 1.82238E-06        | 0        | 0        | 0        | 0        | 0        | 1        | 0        | 0        | 0        | 0        | 0        | 0        | 0   | 0   |
| BCC130  | 58  | 676326      | 3               | 4.43573E-06        | 0        | 0        | 0        | 0        | 0        | 0        | 3        | 0        | 0        | 0        | 0        | 0        | 0   | 0   |
| BCC131  | 58  | 731821      | 0               | 0                  | 0        | 0        | 0        | 0        | 0        | 0        | 0        | 0        | 0        | 0        | 0        | 0        | 0   | 0   |
| BCC132  | 57  | 507194      | 1               | 1.97163E-06        | 0        | 0        | 0        | 0        | 0        | 0        | 1        | 0        | 0        | 0        | 0        | 0        | 0   | 0   |

| Subject | Age | Copy number | Total Mutations | Mutation Frequency | 6562 T>C | 6562 T>A | 6562 T>G | 6563 C>A | 6563 C>G | 6563 C>T | 6564 G>A | 6564 G>C | 6564 G>T | 6565 A>C | 6565 A>G | 6565 A>T | Ins | Del |
|---------|-----|-------------|-----------------|--------------------|----------|----------|----------|----------|----------|----------|----------|----------|----------|----------|----------|----------|-----|-----|
| BCC133  | 55  | 483138      | 2               | 4.13961E-06        | 0        | 0        | 0        | 0        | 0        | 0        | 1        | 0        | 1        | 0        | 0        | 0        | 0   | 0   |
| BCC134  | 63  | 470642      | 0               | 0                  | 0        | 0        | 0        | 0        | 0        | 0        | 0        | 0        | 0        | 0        | 0        | 0        | 0   | 0   |
| BCC135  | 38  | 318497      | 1               | 3.13974E-06        | 0        | 0        | 0        | 0        | 0        | 0        | 0        | 0        | 0        | 0        | 1        | 0        | 0   | 0   |
| BCC136  | 44  | 780589      | 2               | 2.56217E-06        | 0        | 0        | 0        | 0        | 0        | 2        | 0        | 0        | 0        | 0        | 0        | 0        | 0   | 0   |
| BCC137  | 50  | 623936      | 3               | 4.80819E-06        | 0        | 0        | 0        | 0        | 0        | 1        | 1        | 0        | 0        | 0        | 1        | 0        | 0   | 0   |
| BCC138  | 59  | 606932      | 0               | 0                  | 0        | 0        | 0        | 0        | 0        | 0        | 0        | 0        | 0        | 0        | 0        | 0        | 0   | 0   |
| BCC139  | 71  | 331806      | 8               | 2.41105E-05        | 1        | 0        | 0        | 0        | 0        | 0        | 4        | 0        | 3        | 0        | 0        | 0        | 0   | 0   |
| BCC140  | 72  | 156816      | 0               | 0                  | 0        | 0        | 0        | 0        | 0        | 0        | 0        | 0        | 0        | 0        | 0        | 0        | 0   | 0   |
| BCC141  | 57  | 2485912     | 5               | 2.01133E-06        | 3        | 0        | 0        | 0        | 0        | 0        | 1        | 0        | 0        | 0        | 1        | 0        | 0   | 0   |
| BCC142  | 61  | 1014728     | 0               | 0                  | 0        | 0        | 0        | 0        | 0        | 0        | 0        | 0        | 0        | 0        | 0        | 0        | 0   | 0   |
| BCC144  | 76  | 551056      | 3               | 5.44409E-06        | 0        | 0        | 0        | 0        | 0        | 0        | 2        | 0        | 0        | 0        | 0        | 1        | 0   | 0   |
| BCC145  | 55  | 145464      | 1               | 6.87455E-06        | 0        | 0        | 0        | 0        | 0        | 0        | 1        | 0        | 0        | 0        | 0        | 0        | 0   | 0   |
| BCC146  | 43  | 3846304     | 1               | 2.5999E-07         | 0        | 0        | 0        | 0        | 0        | 0        | 1        | 0        | 0        | 0        | 0        | 0        | 0   | 0   |
| BCC147  | 21  | 1500752     | 2               | 1.33267E-06        | 0        | 0        | 0        | 1        | 0        | 0        | 0        | 0        | 0        | 0        | 1        | 0        | 0   | 0   |
| BCC148  | 48  | 1254440     | 2               | 1.59434E-06        | 2        | 0        | 0        | 0        | 0        | 0        | 0        | 0        | 0        | 0        | 0        | 0        | 0   | 0   |
| BCC149  | 37  | 1383272     | 3               | 2.16877E-06        | 0        | 0        | 0        | 0        | 0        | 0        | 3        | 0        | 0        | 0        | 0        | 0        | 0   | 0   |
| BCC150  | 37  | 671176      | 0               | 0                  | 0        | 0        | 0        | 0        | 0        | 0        | 0        | 0        | 0        | 0        | 0        | 0        | 0   | 0   |
| BCC151  | 56  | 806784      | 1               | 1.23949E-06        | 0        | 0        | 0        | 0        | 0        | 1        | 0        | 0        | 0        | 0        | 0        | 0        | 0   | 0   |
| BCC152  | 45  | 1018072     | 2               | 1.9645E-06         | 0        | 0        | 0        | 0        | 0        | 0        | 1        | 0        | 1        | 0        | 0        | 0        | 0   | 0   |
| BCC153  | 46  | 1671648     | 13              | 7.77676E-06        | 0        | 0        | 0        | 0        | 0        | 6        | 7        | 0        | 0        | 0        | 0        | 0        | 0   | 0   |
| BCC154  | 50  | 3693008     | 2               | 5.41564E-07        | 0        | 0        | 0        | 0        | 0        | 0        | 0        | 0        | 1        | 0        | 1        | 0        | 0   | 0   |
| BCC155  | 26  | 1370512     | 1               | 7.29654E-07        | 0        | 0        | 0        | 0        | 0        | 0        | 1        | 0        | 0        | 0        | 0        | 0        | 0   | 0   |
| BCC156  | 37  | 150832      | 0               | 0                  | 0        | 0        | 0        | 0        | 0        | 0        | 0        | 0        | 0        | 0        | 0        | 0        | 0   | 0   |
| BCC157  | 61  | 345312      | 1               | 2.89593E-06        | 0        | 0        | 0        | 0        | 0        | 0        | 1        | 0        | 0        | 0        | 0        | 0        | 0   | 0   |
| BCC158  | 34  | 522192      | 1               | 1.915E-06          | 0        | 0        | 0        | 0        | 0        | 0        | 1        | 0        | 0        | 0        | 0        | 0        | 0   | 0   |
| BCC160  | 68  | 410872      | 2               | 4.8677E-06         | 0        | 0        | 0        | 0        | 0        | 1        | 1        | 0        | 0        | 0        | 0        | 0        | 0   | 0   |
| BCC161  | 37  | 935792      | 3               | 3.20584E-06        | 1        | 0        | 0        | 1        | 0        | 0        | 0        | 0        | 0        | 1        | 0        | 0        | 0   | 0   |
| BCC162  | 35  | 935968      | 3               | 3.20524E-06        | 0        | 0        | 0        | 0        | 0        | 0        | 2        | 0        | 0        | 0        | 1        | 0        | 0   | 0   |
| BCC163  | 27  | 1587960     | 7               | 4.40817E-06        | 0        | 0        | 0        | 0        | 0        | 0        | 6        | 0        | 0        | 0        | 1        | 0        | 0   | 0   |
| BCC164  | 43  | 1955712     | 16              | 8.18116E-06        | 0        | 0        | 0        | 0        | 0        | 0        | 16       | 0        | 0        | 0        | 0        | 0        | 0   | 0   |
| BCC165  | 25  | 2417624     | 6               | 2.48178E-06        | 1        | 0        | 0        | 0        | 0        | 0        | 3        | 0        | 0        | 0        | 2        | 0        | 0   | 0   |
| BCC166  | 50  | 1598432     | 1               | 6.25613E-07        | 0        | 0        | 0        | 0        | 0        | 0        | 0        | 0        | 0        | 0        | 1        | 0        | 0   | 0   |
| BCC167  | 46  | 752752      | 5               | 6.64229E-06        | 0        | 0        | 0        | 1        | 0        | 1        | 0        | 0        | 1        | 0        | 2        | 0        | 0   | 0   |
| BCC168  | 66  | 888624      | 0               | 0                  | 0        | 0        | 0        | 0        | 0        | 0        | 0        | 0        | 0        | 0        | 0        | 0        | 0   | 0   |
| BCC169  | 50  | 1333288     | 8               | 6.0002E-06         | 1        | 0        | 0        | 0        | 0        | 0        | 4        | 0        | 1        | 0        | 2        | 0        | 0   | 0   |
| BCC171  | 44  | 1416184     | 1               | 7.06123E-07        | 0        | 0        | 0        | 0        | 0        | 0        | 1        | 0        | 0        | 0        | 0        | 0        | 0   | 0   |
| BCC172  | 48  | 721424      | 5               | 6.93074E-06        | 4        | 0        | 0        | 0        | 0        | 1        | 0        | 0        | 0        | 0        | 0        | 0        | 0   | 0   |
| BCC173  | 41  | 4407920     | 7               | 1.58805E-06        | 0        | 0        | 0        | 0        | 0        | 1        | 3        | 0        | 0        | 0        | 2        | 0        | 0   | 1   |
| BCC174  | 51  | 3048320     | 13              | 4.26464E-06        | 0        | 0        | 0        | 0        | 0        | 2        | 9        | 0        | 0        | 0        | 2        | 0        | 0   | 0   |
| BCC175  | 51  | 723639      | 2               | 2.76381E-06        | 0        | 0        | 0        | 0        | 0        | 0        | 1        | 0        | 0        | 0        | 0        | 1        | 0   | 0   |
| BCC176  | 67  | 1778480     | 11              | 6.18506E-06        | 1        | 0        | 0        | 0        | 0        | 4        | 5        | 0        | 0        | 0        | 1        | 0        | 0   | 0   |
| BCC177  | 50  | 2458368     | 16              | 6.50838E-06        | 0        | 0        | 0        | 0        | 0        | 0        | 15       | 0        | 0        | 0        | 1        | 0        | 0   | 0   |
| BCC178  | 43  | 959464      | 1               | 1.04225E-06        | 0        | 0        | 0        | 0        | 0        | 0        | 0        | 0        | 1        | 0        | 0        | 0        | 0   | 0   |
| BCC179  | 40  | 664928      | 13              | 1.9551E-05         | 1        | 0        | 0        | 0        | 0        | 0        | 12       | 0        | 0        | 0        | 0        | 0        | 0   | 0   |
| BCC180  | 25  | 1181400     | 4               | 3.38581E-06        | 0        | 0        | 0        | 0        | 0        | 0        | 4        | 0        | 0        | 0        | 0        | 0        | 0   | 0   |
| BCC181  | 57  | 305101      | 5               | 1.6388E-05         | 5        | 0        | 0        | 0        | 0        | 0        | 0        | 0        | 0        | 0        | 0        | 0        | 0   | 0   |
| BCC182  | 70  | 802317      | 5               | 6.23195E-06        | 0        | 0        | 0        | 0        | 0        | 0        | 4        | 0        | 1        | 0        | 0        | 0        | 0   | 0   |
| BCC183  | 50  | 1057011     | 2               | 1.89213E-06        | 0        | 0        | 0        | 0        | 0        | 0        | 1        | 0        | 0        | 0        | 1        | 0        | 0   | 0   |
| BCC184  | 52  | 2054773     | 3               | 1.46002E-06        | 0        | 0        | 0        | 0        | 0        | 1        | 1        | 0        | 0        | 0        | 1        | 0        | 0   | 0   |
| BCC185  | 56  | 575019      | 2               | 3.47814E-06        | 0        | 0        | 0        | 0        | 0        | 0        | 1        | 0        | 0        | 0        | 1        | 0        | 0   | 0   |
| BCC187  | 34  | 1793281     | 7               | 3.90346E-06        | 0        | 0        | 0        | 0        | 0        | 0        | 5        | 0        | 0        | 0        | 2        | 0        | 0   | 0   |

| Subject | Age | Copy number | Total Mutations | Mutation Frequency | 6562 T>C | 6562 T>A | 6562 T>G | 6563 C>A | 6563 C>G | 6563 C>T | 6564 G>A | 6564 G>C | 6564 G>T | 6565 A>C | 6565 A>G | 6565 A>T | Ins | Del |
|---------|-----|-------------|-----------------|--------------------|----------|----------|----------|----------|----------|----------|----------|----------|----------|----------|----------|----------|-----|-----|
| BCC188  | 51  | 2094218     | 8               | 3.82004E-06        | 0        | 0        | 0        | 0        | 0        | 2        | 5        | 0        | 0        | 0        | 1        | 0        | 0   | 0   |
| BCC189  | 59  | 171116      | 1               | 5.844E-06          | 0        | 0        | 0        | 0        | 0        | 0        | 0        | 0        | 1        | 0        | 0        | 0        | 0   | 0   |
| BCC190  | 38  | 912541      | 9               | 9.86257E-06        | 0        | 0        | 0        | 0        | 0        | 0        | 9        | 0        | 0        | 0        | 0        | 0        | 0   | 0   |
| BCC191  | 56  | 1031459     | 9               | 8.7255E-06         | 0        | 0        | 0        | 0        | 0        | 7        | 1        | 1        | 0        | 0        | 0        | 0        | 0   | 0   |
| BCC192  | 53  | 1117337     | 1               | 8.94985E-07        | 0        | 0        | 0        | 0        | 0        | 0        | 1        | 0        | 0        | 0        | 0        | 0        | 0   | 0   |
| BCC193  | 45  | 63064       | 3               | 4.75707E-05        | 0        | 0        | 0        | 0        | 0        | 0        | 3        | 0        | 0        | 0        | 0        | 0        | 0   | 0   |
| BCC194  | 33  | 241280      | 1               | 4.14456E-06        | 0        | 0        | 0        | 0        | 0        | 0        | 0        | 0        | 0        | 1        | 0        | 0        | 0   | 0   |
| BCC195  | 38  | 1208480     | 9               | 7.44737E-06        | 0        | 0        | 0        | 0        | 0        | 1        | 8        | 0        | 0        | 0        | 0        | 0        | 0   | 0   |
| BCC196  | 43  | 241940      | 1               | 4.13325E-06        | 0        | 0        | 0        | 0        | 0        | 0        | 1        | 0        | 0        | 0        | 0        | 0        | 0   | 0   |
| BCC197  | 53  | 3250274     | 17              | 5.23033E-06        | 0        | 0        | 0        | 0        | 0        | 0        | 0        | 0        | 0        | 0        | 17       | 0        | 0   | 0   |
| BCC198  | 38  | 1000012     | 4               | 3.99995E-06        | 0        | 0        | 0        | 1        | 0        | 0        | 2        | 0        | 1        | 0        | 0        | 0        | 0   | 0   |
| BCC199  | 65  | 535191      | 5               | 9.34246E-06        | 1        | 0        | 0        | 0        | 0        | 0        | 1        | 0        | 3        | 0        | 0        | 0        | 0   | 0   |
| BCC200  | 41  | 580046      | 5               | 8.62E-06           | 1        | 0        | 0        | 0        | 0        | 0        | 3        | 0        | 0        | 0        | 0        | 0        | 0   | 1   |
| BCC201  | 38  | 5066210     | 1               | 1.97386E-07        | 0        | 0        | 0        | 0        | 0        | 0        | 1        | 0        | 0        | 0        | 0        | 0        | 0   | 0   |
| BCC202  | 50  | 1554201     | 4               | 2.57367E-06        | 0        | 0        | 0        | 0        | 0        | 1        | 1        | 0        | 1        | 0        | 1        | 0        | 0   | 0   |
| BCC203  | 70  | 646234      | 14              | 2.1664E-05         | 1        | 0        | 0        | 0        | 0        | 0        | 13       | 0        | 0        | 0        | 0        | 0        | 0   | 0   |
| BCC204  | 57  | 633001      | 11              | 1.73775E-05        | 8        | 0        | 0        | 0        | 0        | 0        | 2        | 0        | 0        | 0        | 1        | 0        | 0   | 0   |
| BCC205  | 23  | 157090      | 2               | 1.27316E-05        | 0        | 0        | 0        | 0        | 0        | 0        | 1        | 0        | 1        | 0        | 0        | 0        | 0   | 0   |
| BCC206  | 54  | 354894      | 6               | 1.69065E-05        | 0        | 0        | 0        | 1        | 0        | 0        | 0        | 0        | 0        | 5        | 0        | 0        | 0   | 0   |
| BCC207  | 62  | 563880      | 6               | 1.06406E-05        | 4        | 0        | 0        | 0        | 0        | 0        | 0        | 0        | 0        | 0        | 2        | 0        | 0   | 0   |
| BCC208  | 54  | 125396      | 1               | 7.97472E-06        | 0        | 0        | 0        | 0        | 0        | 0        | 1        | 0        | 0        | 0        | 0        | 0        | 0   | 0   |
| BCC209  | 40  | 963051      | 0               | 0                  | 0        | 0        | 0        | 0        | 0        | 0        | 0        | 0        | 0        | 0        | 0        | 0        | 0   | 0   |
| BCC210  | 37  | 440776      | 3               | 6.80618E-06        | 0        | 0        | 0        | 0        | 0        | 0        | 3        | 0        | 0        | 0        | 0        | 0        | 0   | 0   |
| BCC211  | 35  | 4060225     | 5               | 1.23146E-06        | 0        | 0        | 0        | 2        | 0        | 0        | 0        | 0        | 3        | 0        | 0        | 0        | 0   | 0   |
| BCC212  | 45  | 263020      | 2               | 7.60398E-06        | 0        | 0        | 0        | 1        | 0        | 0        | 1        | 0        | 0        | 0        | 0        | 0        | 0   | 0   |
| BCC213  | 71  | 692250      | 2               | 2.88913E-06        | 0        | 0        | 0        | 0        | 0        | 0        | 1        | 0        | 0        | 0        | 1        | 0        | 0   | 0   |
| BCC214  | 48  | 947081      | 2               | 2.11175E-06        | 1        | 0        | 0        | 0        | 0        | 0        | 0        | 0        | 0        | 0        | 1        | 0        | 0   | 0   |
| BCC215  | 40  | 466850      | 2               | 4.28403E-06        | 1        | 0        | 0        | 0        | 0        | 0        | 1        | 0        | 0        | 0        | 0        | 0        | 0   | 0   |
| BCC216  | 48  | 1449838     | 5               | 3.44866E-06        | 0        | 0        | 0        | 0        | 0        | 1        | 4        | 0        | 0        | 0        | 0        | 0        | 0   | 0   |
| BCC217  | 36  | 1690522     | 6               | 3.5492E-06         | 0        | 0        | 0        | 0        | 0        | 0        | 3        | 0        | 0        | 1        | 0        | 0        | 0   | 2   |
| BCC218  | 36  | 983496      | 0               | 0                  | 0        | 0        | 0        | 0        | 0        | 0        | 0        | 0        | 0        | 0        | 0        | 0        | 0   | 0   |
| BCC219  | 42  | 718803      | 0               | 0                  | 0        | 0        | 0        | 0        | 0        | 0        | 0        | 0        | 0        | 0        | 0        | 0        | 0   | 0   |
| BCC220  | 33  | 91281       | 1               | 1.09552E-05        | 0        | 0        | 0        | 0        | 0        | 0        | 0        | 0        | 0        | 0        | 0        | 0        | 0   | 1   |
| BCC221  | 47  | 546922      | 2               | 3.65683E-06        | 0        | 0        | 0        | 1        | 0        | 0        | 1        | 0        | 0        | 0        | 0        | 0        | 0   | 0   |
| BCC222  | 75  | 1738176     | 4               | 2.30126E-06        | 0        | 0        | 0        | 1        | 0        | 0        | 2        | 0        | 0        | 0        | 0        | 0        | 0   | 1   |
| BCC223  | 54  | 365755      | 2               | 5.46815E-06        | 0        | 0        | 0        | 0        | 0        | 0        | 0        | 0        | 0        | 0        | 2        | 0        | 0   | 0   |
| BCC225  | 28  | 590137      | 6               | 1.01671E-05        | 1        | 0        | 0        | 0        | 0        | 0        | 3        | 0        | 0        | 0        | 2        | 0        | 0   | 0   |
| BCC226  | 57  | 849514      | 4               | 4.70858E-06        | 0        | 0        | 0        | 0        | 0        | 0        | 3        | 0        | 0        | 0        | 1        | 0        | 0   | 0   |
| BCC227  | 67  | 921423      | 2               | 2.17056E-06        | 0        | 0        | 0        | 0        | 0        | 0        | 1        | 0        | 0        | 0        | 1        | 0        | 0   | 0   |
| BCC228  | 60  | 1118317     | 0               | 0                  | 0        | 0        | 0        | 0        | 0        | 0        | 0        | 0        | 0        | 0        | 0        | 0        | 0   | 0   |
| BCC229  | 34  | 143862      | 1               | 6.9511E-06         | 0        | 0        | 0        | 0        | 0        | 1        | 0        | 0        | 0        | 0        | 0        | 0        | 0   | 0   |
| BCC230  | 58  | 548066      | 2               | 3.6492E-06         | 0        | 0        | 0        | 2        | 0        | 0        | 0        | 0        | 0        | 0        | 0        | 0        | 0   | 0   |
| BCC232  | 45  | 870232      | 3               | 3.44736E-06        | 1        | 0        | 0        | 0        | 0        | 0        | 1        | 0        | 1        | 0        | 0        | 0        | 0   | 0   |
| BCC233  | 37  | 57733       | 1               | 1.73213E-05        | 0        | 0        | 0        | 0        | 0        | 1        | 0        | 0        | 0        | 0        | 0        | 0        | 0   | 0   |
| BCC242  | 35  | 388049      | 10              | 2.577E-05          | 0        | 0        | 0        | 0        | 0        | 0        | 1        | 0        | 9        | 0        | 0        | 0        | 0   | 0   |
| BCC243  | 38  | 106755      | 2               | 1.87344E-05        | 0        | 0        | 0        | 0        | 0        | 0        | 2        | 0        | 0        | 0        | 0        | 0        | 0   | 0   |
| BCC244  | 23  | 256688      | 1               | 3.89578E-06        | 0        | 0        | 0        | 0        | 0        | 1        | 0        | 0        | 0        | 0        | 0        | 0        | 0   | 0   |
| BCC245  | 21  | 558114      | 3               | 5.37524E-06        | 1        | 0        | 0        | 0        | 0        | 0        | 2        | 0        | 0        | 0        | 0        | 0        | 0   | 0   |
| BCC247  | 45  | 172101      | 10              | 5.81053E-05        | 0        | 0        | 0        | 0        | 0        | 0        | 10       | 0        | 0        | 0        | 0        | 0        | 0   | 0   |
| BCC248  | 58  | 2355544     | 20              | 8.49061E-06        | 0        | 0        | 0        | 0        | 0        | 0        | 20       | 0        | 0        | 0        | 0        | 0        | 0   | 0   |
| BCC249  | 41  | 1386692     | 10              | 7.21141E-06        | 0        | 0        | 0        | 0        | 0        | 0        | 10       | 0        | 0        | 0        | 0        | 0        | 0   | 0   |

| Subject | Age | Copy number | Total Mutations | Mutation Frequency | 6562 T>C | 6562 T>A | 6562 T>G | 6563 C>A | 6563 C>G | 6563 C>T | 6564 G>A | 6564 G>C | 6564 G>T | 6565 A>C | 6565 A>G | 6565 A>T | Ins | Del |
|---------|-----|-------------|-----------------|--------------------|----------|----------|----------|----------|----------|----------|----------|----------|----------|----------|----------|----------|-----|-----|
| BCC250  | 45  | 618249      | 10              | 1.61747E-05        | 0        | 0        | 0        | 0        | 0        | 0        | 10       | 0        | 0        | 0        | 0        | 0        | 0   | 0   |
| BCC251  | 41  | 936018      | 1               | 1.06836E-06        | 0        | 0        | 0        | 0        | 0        | 0        | 1        | 0        | 0        | 0        | 0        | 0        | 0   | 0   |
| BCC252  | 53  | 527969      | 5               | 9.47025E-06        | 0        | 0        | 0        | 0        | 0        | 0        | 5        | 0        | 0        | 0        | 0        | 0        | 0   | 0   |
| BCC260  | 71  | 290770      | 3               | 1.03174E-05        | 0        | 0        | 0        | 0        | 0        | 0        | 3        | 0        | 0        | 0        | 0        | 0        | 0   | 0   |
| BCC265  | 72  | 631719      | 0               | 0                  | 0        | 0        | 0        | 0        | 0        | 0        | 0        | 0        | 0        | 0        | 0        | 0        | 0   | 0   |
| BCC266  | 74  | 611718      | 22              | 3.59643E-05        | 0        | 0        | 0        | 0        | 0        | 0        | 22       | 0        | 0        | 0        | 0        | 0        | 0   | 0   |
