# Supplementary material for: Clonal Expansion of Early to Mid-Life Mitochondrial DNA Point Mutations Drives Mitochondrial Dysfunction during Human Ageing
Source: PubMed Central journal article supplement (PMC4169240; doi:10.1371/journal.pgen.1004620), 2014-09-18
Supplement: pgen.1004620.s003.pdf [file pgen.1004620.s003.pdf]

**Table S2:** Mitochondrial DNA (mtDNA) mutations detected by Ion Torrent Next Generation Sequencing in human colonic epithelium  
 MtDNA mutations highlighted in red are present in both buccal and colonic epithelium in that subject.  
 (Germline Ref) is the reference base for that individual subject which is different from the rCRS  
 rCRS: Revised Cambridge Reference Sequence

| Participant ID | Age | Base Position | Reference Base (rCRS) | Mutant Base | Mutant Frequency | Heteroplasmy | Gene       | Amino Acid Change | Reported Polymorphism |
|----------------|-----|---------------|-----------------------|-------------|------------------|--------------|------------|-------------------|-----------------------|
| BCC044         | 72  | 150           | C                     | T           | 34               | 2.08         | Non-coding | ~                 | Yes                   |
| BCC044         | 72  | 204           | T                     | C           | 38               | 2.55         | Non-coding | ~                 | Yes                   |
| BCC044         | 72  | 215           | G (Germline ref)      | A           | 11               | 0.85         | Non-coding | ~                 | Yes                   |
| BCC044         | 72  | 1255          | T                     | C           | 20               | 0.93         | MT-RNR1    | ~                 | Yes                   |
| BCC044         | 72  | 1777          | A                     | G           | 8                | 0.93         | MT-RNR2    | ~                 | No                    |
| BCC044         | 72  | 2148          | A                     | G           | 11               | 0.82         | MT-RNR2    | ~                 | No                    |
| BCC044         | 72  | 2315          | A                     | G           | 11               | 0.8          | MT-RNR2    | ~                 | Yes                   |
| BCC044         | 72  | 4592          | T                     | G           | 8                | 0.98         | MT-ND2     | Synonymous        | No                    |
| BCC044         | 72  | 7028          | T (Germline Ref)      | C           | 10               | 0.87         | MT-CO1     | Synonymous        | Yes                   |
| BCC044         | 72  | 7372          | T                     | C           | 6                | 1.01         | MT-CO1     | p.M490T           | Yes                   |
| BCC044         | 72  | 12540         | A                     | G           | 8                | 1.02         | MT-ND5     | Synonymous        | Yes                   |
| BCC047         | 76  | 93            | A                     | G           | 77               | 1.58         | Non-coding | ~                 | Yes                   |
| BCC047         | 76  | 1598          | G                     | A           | 328              | 7.51         | MT-RNR1    | ~                 | Yes                   |
| BCC047         | 76  | 1985          | G                     | A           | 63               | 0.95         | MT-RNR2    | ~                 | No                    |
| BCC047         | 76  | 2143          | G                     | A           | 37               | 0.8          | MT-RNR2    | ~                 | No                    |
| BCC047         | 76  | 2333          | G                     | A           | 51               | 1.01         | MT-RNR2    | ~                 | No                    |
| BCC047         | 76  | 2733          | G                     | A           | 54               | 0.87         | MT-RNR2    | ~                 | No                    |
| BCC047         | 76  | 3091          | G                     | A           | 421              | 6.73         | MT-RNR2    | ~                 | No                    |
| BCC047         | 76  | 12722         | C (Germline Ref)      | T           | 87               | 1.27         | MT-ND5     | p.P129K           | No                    |
| BCC047         | 76  | 13480         | G                     | A           | 25               | 0.92         | MT-ND5     | Synonymous        | No                    |
| BCC047         | 76  | 13540         | T                     | C           | 57               | 2.65         | MT-ND5     | p.S402P           | No                    |
| BCC047         | 76  | 14200         | T                     | C           | 8                | 1.03         | MT-ND6     | Synonymous        | Yes                   |
| BCC047         | 76  | 14985         | G                     | A           | 589              | 10.11        | MT-CYB     | p.A80H            | No                    |
| BCC047         | 76  | 15093         | G                     | A           | 910              | 10.92        | MT-CYB     | p.G116D           | No                    |
| BCC047         | 76  | 16034         | G                     | A           | 70               | 0.9          | Non-coding | ~                 | No                    |
| BCC098         | 17  | 1598          | G                     | A           | 37               | 0.86         | MT-RNR1    | ~                 | Yes                   |
| BCC098         | 17  | 8518          | A                     | G           | 5                | 0.81         | MT-ATP8    | Synonymous        | Yes                   |
| BCC098         | 17  | 12308         | G (Germline ref)      | A           | 36               | 1.4          | MT-TL2     | ~                 | Yes                   |
| BCC098         | 17  | 14750         | A                     | G           | 4                | 0.81         | MT-CYB     | p.T2A             | Yes                   |
| BCC110         | 24  | 3915          | A (Germline ref)      | G           | 39               | 1.08         | MT-ND1     | Synonymous        | Yes                   |
| BCC110         | 24  | 11253         | C (Germline Ref)      | T           | 14               | 1.09         | MT-ND4     | Synonymous        | Yes                   |
| BCC110         | 24  | 12746         | T                     | C           | 85               | 2.04         | MT-ND5     | p.K137P           | No                    |
| BCC110         | 24  | 16362         | C (Germline Ref)      | T           | 14               | 0.88         | Non-coding | ~                 | Yes                   |
| BCC112         | 25  | 4769          | G (Germline ref)      | A           | 28               | 1            | MT-ND2     | Synonymous        | Yes                   |
| BCC112         | 25  | 5782          | T                     | C           | 9                | 0.89         | MT-TC      | ~                 | Yes                   |
| BCC112         | 25  | 8994          | A (Germline ref)      | G           | 4                | 1.17         | MT-ATP6    | Synonymous        | Yes                   |
| BCC112         | 25  | 13917         | A                     | G           | 7                | 0.92         | MT-ND5     | Synonymous        | Yes                   |
| BCC112         | 25  | 14053         | G (Germline ref)      | A           | 9                | 2.63         | MT-ND5     | Synonymous        | Yes                   |
| BCC113         | 78  | 185           | A (Germline ref)      | G           | 206              | 5.58         | Non-coding | ~                 | Yes                   |
| BCC113         | 78  | 189           | A                     | G           | 43               | 1.17         | Non-coding | ~                 | Yes                   |

| Participant ID | Age | Base Position | Reference Base (rCRS) | Mutant Base | Mutant Frequency | Heteroplasmy | Gene       | Amino Acid Change | Reported Polymorphism |
|----------------|-----|---------------|-----------------------|-------------|------------------|--------------|------------|-------------------|-----------------------|
| BCC113         | 78  | 1731          | A                     | G           | 58               | 4.65         | MT-RNR2    | ~                 | No                    |
| BCC113         | 78  | 1966          | G                     | A           | 82               | 2            | MT-RNR2    | ~                 | No                    |
| BCC113         | 78  | 2778          | T                     | C           | 23               | 0.91         | MT-RNR2    | ~                 | Yes                   |
| BCC113         | 78  | 3880          | G                     | A           | 11               | 0.86         | MT-ND1     | p.E192K           | No                    |
| BCC113         | 78  | 9024          | A                     | G           | 6                | 0.85         | MT-ATP6    | Synonymous        | Yes                   |
| BCC113         | 78  | 10325         | G                     | A           | 39               | 1.33         | MT-ND3     | Synonymous        | Yes                   |
| BCC113         | 78  | 11456         | G                     | A           | 25               | 0.88         | MT-ND4     | p.A233T           | No                    |
| BCC113         | 78  | 12287         | T                     | G           | 87               | 2.81         | MT-TL2     | ~                 | No                    |
| BCC113         | 78  | 12519         | T                     | C           | 30               | 1.85         | MT-ND5     | Synonymous        | Yes                   |
| BCC113         | 78  | 15452         | A (Germline ref)      | C           | 6                | 0.99         | MT-CYB     | p.I236K           | No                    |
| BCC113         | 78  | 15757         | G (Germline ref)      | A           | 36               | 1.28         | MT-CYB     | Synonymous        | Yes                   |
| BCC113         | 78  | 16034         | G                     | A           | 37               | 0.8          | Non-coding | ~                 | No                    |
| BCC113         | 78  | 16093         | C (Germline Ref)      | T           | 424              | 12.88        | Non-coding | ~                 | Yes                   |
| BCC113         | 78  | 16355         | C                     | T           | 73               | 3.85         | Non-coding | ~                 | Yes                   |
| BCC117         | 25  | 7363          | A                     | G           | 6                | 0.99         | MT-CO1     | p.E487G           | Yes                   |
| BCC117         | 25  | 12546         | A                     | G           | 17               | 0.85         | MT-ND5     | Synonymous        | No                    |
| BCC117         | 25  | 12584         | A                     | G           | 21               | 0.8          | MT-ND5     | p.D83G            | No                    |
| BCC117         | 25  | 14202         | A                     | G           | 4                | 0.8          | MT-ND6     | p.W158R           | No                    |
| BCC165         | 25  | 10992         | C (Germline Ref)      | T           | 4                | 0.83         | MT-ND4     | p.T78M            | No                    |
| BCC165         | 25  | 12308         | G (Germline ref)      | A           | 18               | 1.35         | MT-TL2     | ~                 | Yes                   |
| BCC165         | 25  | 15140         | G                     | C           | 33               | 1.1          | MT-CYB     | p.V132L           | No                    |
| BCC180         | 25  | 5059          | A                     | G           | 8                | 0.8          | MT-ND2     | p.N197S           | No                    |
| BCC205         | 23  | 3352          | G                     | A           | 5                | 1.11         | MT-ND1     | p.A16T            | No                    |
| BCC205         | 23  | 5874          | T                     | C           | 7                | 0.95         | MT-TY      | ~                 | No                    |
| BCC205         | 23  | 5973          | G                     | A           | 20               | 2.6          | MT-CO1     | p.A24T            | Yes                   |
| BCC205         | 23  | 7058          | T                     | C           | 6                | 0.84         | MT-CO1     | Synonymous        | Yes                   |
| BCC205         | 23  | 7295          | A                     | G           | 6                | 0.8          | MT-CO1     | Synonymous        | Yes                   |
| BCC205         | 23  | 7961          | T                     | C           | 5                | 0.88         | MT-CO2     | Synonymous        | Yes                   |
| BCC205         | 23  | 9926          | A                     | G           | 8                | 0.83         | MT-CO3     | Synonymous        | Yes                   |
| BCC213         | 71  | 653           | G                     | A           | 38               | 2.05         | MT-RNR1    | ~                 | No                    |
| BCC213         | 71  | 3424          | G                     | A           | 27               | 1.75         | MT-ND1     | p.V40M            | No                    |
| BCC213         | 71  | 11921         | T                     | C           | 14               | 0.93         | MT-ND4     | p.W388R           | No                    |
| BCC213         | 71  | 15713         | T                     | C           | 26               | 1.12         | MT-CYB     | Synonymous        | Yes                   |
| BCC213         | 71  | 15928         | G                     | A           | 79               | 1.95         | MT-TT      | ~                 | Yes                   |
| BCC222         | 75  | 146           | T                     | C           | 56               | 2.17         | Non-coding | ~                 | Yes                   |
| BCC222         | 75  | 204           | T                     | C           | 23               | 1            | Non-coding | ~                 | Yes                   |
| BCC222         | 75  | 3593          | T                     | C           | 4                | 0.97         | MT-ND1     | p.V96A            | Yes                   |
| BCC222         | 75  | 4510          | T                     | C           | 37               | 1.5          | MT-ND2     | p.F14S            | No                    |
| BCC222         | 75  | 10685         | G                     | A           | 10               | 0.83         | MT-ND4L    | Synonymous        | Yes                   |
| BCC222         | 75  | 12345         | G                     | A           | 7                | 0.9          | MT-ND5     | Synonymous        | No                    |
| BCC222         | 75  | 12701         | T                     | C           | 31               | 1.08         | MT-ND5     | p.K122P           | No                    |
| BCC222         | 75  | 15234         | G                     | A           | 51               | 1.71         | MT-CYB     | Synonymous        | No                    |
| BCC222         | 75  | 16023         | G                     | A           | 46               | 1.22         | Non-coding | ~                 | No                    |
| BCC244         | 23  | 11251         | G (Germline ref)      | A           | 15               | 0.81         | MT-ND4     | Synonymous        | Yes                   |
| BCC244         | 23  | 12007         | A (Germline ref)      | G           | 32               | 1.84         | MT-ND4     | Synonymous        | Yes                   |

| Participant ID | Age | Base Position | Reference Base (rCRS) | Mutant Base | Mutant Frequency | Heteroplasmy | Gene       | Amino Acid Change | Reported Polymorphism |
|----------------|-----|---------------|-----------------------|-------------|------------------|--------------|------------|-------------------|-----------------------|
| BCC244         | 23  | 14692         | A                     | G           | 7                | 1            | MT-TE      | ~                 | Yes                   |
| BCC260         | 71  | 2342          | T                     | C           | 51               | 1.41         | MT-RNR2    | ~                 | No                    |
| BCC260         | 71  | 2903          | T                     | C           | 12               | 1.35         | MT-RNR2    | ~                 | Yes                   |
| BCC260         | 71  | 4721          | A                     | G           | 5                | 1.19         | MT-ND2     | Synonymous        | Yes                   |
| BCC260         | 71  | 5981          | T                     | C           | 6                | 1.01         | MT-CO1     | Synonymous        | Yes                   |
| BCC260         | 71  | 6141          | A                     | G           | 7                | 0.85         | MT-CO1     | p.N80D            | No                    |
| BCC260         | 71  | 6216          | T                     | C           | 6                | 0.83         | MT-CO1     | Synonymous        | Yes                   |
| BCC260         | 71  | 7028          | T (Germline Ref)      | C           | 6                | 0.84         | MT-CO1     | Synonymous        | Yes                   |
| BCC260         | 71  | 8152          | A (Germline ref)      | G           | 6                | 0.9          | MT-CO2     | Synonymous        | Yes                   |
| BCC260         | 71  | 9789          | T                     | C           | 5                | 0.89         | MT-CO3     | p.S195P           | No                    |
| BCC260         | 71  | 10569         | G                     | T           | 6                | 0.91         | MT-ND4L    | Synonymous        | No                    |
| BCC260         | 71  | 15140         | G                     | A           | 86               | 1.05         | MT-CYB     | p.V132L           | No                    |
| BCC265         | 72  | 189           | A                     | G           | 21               | 0.83         | Non-coding | ~                 | Yes                   |
| BCC265         | 72  | 11334         | A                     | G           | 19               | 1.07         | MT-ND4     | p.N192S           | No                    |
| BCC265         | 72  | 13198         | G                     | A           | 16               | 0.91         | MT-ND5     | p.A288T           | Yes                   |
| BCC265         | 72  | 14865         | G                     | A           | 29               | 2.63         | MT-CYB     | p.C40T            | Yes                   |
| BCC266         | 74  | 2553          | G                     | A           | 64               | 1.18         | MT-RNR2    | ~                 | No                    |
| BCC266         | 74  | 9714          | G                     | A           | 56               | 2.54         | MT-CO3     | p.G170S           | No                    |
| BCC266         | 74  | 10586         | G                     | A           | 26               | 0.96         | MT-ND4L    | Synonymous        | Yes                   |
| BCC266         | 74  | 11456         | G                     | A           | 20               | 1.04         | MT-ND4     | p.A233T           | No                    |
| BCC266         | 74  | 11834         | T                     | C           | 27               | 1.24         | MT-ND4     | p.W359R           | No                    |
| BCC266         | 74  | 13818         | T                     | C           | 7                | 0.86         | MT-ND5     | Synonymous        | Yes                   |
| BCC266         | 74  | 16027         | T                     | C           | 58               | 1.51         | Non-coding | ~                 | No                    |
| BCC266         | 74  | 16035         | G                     | A           | 88               | 2.35         | Non-coding | ~                 | No                    |
