# Supplementary material for: Clonal Expansion of Early to Mid-Life Mitochondrial DNA Point Mutations Drives Mitochondrial Dysfunction during Human Ageing
Source: PubMed Central journal article supplement (PMC4169240; doi:10.1371/journal.pgen.1004620), 2014-09-18
Supplement: pgen.1004620.s004.pdf [file pgen.1004620.s004.pdf]

**Table S3: Mitochondrial DNA (mtDNA) mutations detected by Ion Torrent Next Generation Sequencing in human buccal epithelium**

MtDNA mutations highlighted in red are present in both buccal and colonic epithelium in that subject.

(Germline Ref) is the reference base for that individual subject which is different from the rCRS

rCRS: Revised Cambridge Reference Sequence

| Participant ID | Age | Base position | Reference Base(rCRS) | Mutant Base | Mutant Frequency | Heteroplasmy | Gene       | Amino acid change | Reported Polymorphism |
|----------------|-----|---------------|----------------------|-------------|------------------|--------------|------------|-------------------|-----------------------|
| BCC044 BUC     | 72  | 150           | C                    | T           | 72               | 3.25         | Non-Coding |                   | Yes                   |
| BCC044 BUC     | 72  | 152           | T                    | C           | 69               | 3.12         | Non-Coding |                   | Yes                   |
| BCC044 BUC     | 72  | 189           | A                    | G           | 36               | 1.43         | Non-Coding |                   | Yes                   |
| BCC044 BUC     | 72  | 204           | T                    | C           | 22               | 0.88         | Non-Coding |                   | Yes                   |
| BCC044 BUC     | 72  | 7028          | T (Germline Ref)     | C           | 24               | 0.93         | MT-CO1     | Silent            | Yes                   |
| BCC044 BUC     | 72  | 14093         | T                    | C           | 14               | 0.8          | MT-ND5     | p.L586P           | No                    |
| BCC047 BUC     | 76  | 234           | A                    | G           | 283              | 9.67         | Non-Coding |                   | Yes                   |
| BCC047 BUC     | 76  | 374           | A                    | G           | 13               | 0.85         | Non-Coding |                   | Yes                   |
| BCC098 BUC     | 17  | 4340          | A                    | G           | 17               | 0.83         | MT-TQ      |                   | Yes                   |
| BCC098 BUC     | 17  | 7028          | T (Germline Ref)     | C           | 20               | 0.86         | MT-CO1     | Silent            | Yes                   |
| BCC098 BUC     | 17  | 12308         | G (Germline Ref)     | A           | 49               | 1.23         | MT-TL2     |                   | Yes                   |
| BCC110 BUC     | 24  | 3915          | A (Germline Ref)     | G           | 42               | 1.92         | MT-ND1     | Silent            | Yes                   |
| BCC110 BUC     | 24  | 4935          | A                    | G           | 12               | 0.8          | MT-ND2     | p.T156A           | Yes                   |
| BCC110 BUC     | 24  | 11253         | C (Germline Ref)     | T           | 32               | 0.86         | MT-ND4     | Silent            | Yes                   |
| BCC112 BUC     | 25  | 146           | T                    | C           | 19               | 0.86         | Non-Coding |                   | Yes                   |
| BCC112 BUC     | 25  | 8994          | A (Germline Ref)     | G           | 27               | 1.07         | MT-ATP6    | Silent            | Yes                   |
| BCC112 BUC     | 25  | 14053         | G (Germline Ref)     | A           | 35               | 1.99         | MT-ND5     | Silent            | Yes                   |
| BCC112 BUC     | 25  | 14692         | A                    | G           | 12               | 0.81         | MT-TE      |                   | No                    |
| BCC113 BUC     | 78  | 185           | A (Germline Ref)     | G           | 91               | 2.67         | Non-Coding |                   | Yes                   |
| BCC113 BUC     | 78  | 189           | A                    | G           | 59               | 1.72         | Non-Coding |                   | Yes                   |
| BCC113 BUC     | 78  | 10084         | C (Germline Ref)     | T           | 189              | 3.4          | MT-ND3     | Silent            | Yes                   |
| BCC113 BUC     | 78  | 11684         | T                    | C           | 38               | 0.9          | MT-ND4     | p.F309L           | Yes                   |
| BCC113 BUC     | 78  | 15757         | G (Germline Ref)     | A           | 52               | 1.48         | MT-CYB     | Silent            | Yes                   |
| BCC117 BUC     | 25  | 1811          | G (Germline Ref)     | A           | 33               | 1.14         | MT-RNR2    |                   | Yes                   |
| BCC117 BUC     | 25  | 3480          | G (Germline Ref)     | A           | 12               | 1.31         | MT-ND1     | Silent            | Yes                   |
| BCC117 BUC     | 25  | 5539          | A                    | G           | 11               | 1.17         | MT-TW      |                   | Yes                   |
| BCC117 BUC     | 25  | 7028          | T (Germline Ref)     | C           | 11               | 0.84         | MT-CO1     | Silent            | Yes                   |
| BCC117 BUC     | 25  | 9698          | C (Germline Ref)     | T           | 9                | 0.9          | MT-CO3     | Silent            | Yes                   |
| BCC117 BUC     | 25  | 10550         | G (Germline Ref)     | A           | 42               | 0.98         | MT-ND4L    | Silent            | Yes                   |
| BCC117 BUC     | 25  | 11467         | G (Germline Ref)     | A           | 50               | 1.04         | MT-ND4     | Silent            | Yes                   |
| BCC117 BUC     | 25  | 12308         | G (Germline Ref)     | A           | 58               | 1.33         | MT-TL2     |                   | Yes                   |
| BCC165 BUC     | 25  | 4820          | A (Germline Ref)     | G           | 14               | 0.84         | MT-ND2     | Silent            | Yes                   |
| BCC165 BUC     | 25  | 12308         | G (Germline Ref)     | A           | 47               | 1.08         | MT-TL2     |                   | Yes                   |
| BCC180 BUC     | 25  | 16443         | T                    | C           | 19               | 0.81         | Non-Coding |                   | No                    |
| BCC180 BUC     | 25  | 16541         | A                    | G           | 9                | 0.87         | Non-Coding |                   | No                    |
| BCC205 BUC     | 23  | 4677          | C                    | T           | 41               | 1.89         | MT-ND2     | p.L70F            | No                    |
| BCC205 BUC     | 23  | 5973          | G                    | A           | 94               | 4.4          | MT-CO1     | p.A24T            | Yes                   |
| BCC205 BUC     | 23  | 13094         | T                    | C           | 16               | 0.83         | MT-ND5     | p.V253A           | No                    |

| Participant ID | Age | Base position | Reference Base(rCRS) | Mutant Base | Mutant Frequency | Heteroplasmy | Gene       | Amino acid change | Reported Polymorphism |
|----------------|-----|---------------|----------------------|-------------|------------------|--------------|------------|-------------------|-----------------------|
| BCC213 BUC     | 71  | 152           | T                    | C           | 23               | 0.94         | Non-Coding |                   | Yes                   |
| BCC213 BUC     | 71  | 3424          | G                    | A           | 26               | 0.83         | MT-ND1     | p.V40M            | No                    |
| BCC213 BUC     | 71  | 14858         | G                    | A           | 63               | 4.12         | MT-CYB     | p.G38S            | Yes                   |
| BCC213 BUC     | 71  | 15456         | T                    | C           | 16               | 0.87         | MT-CYB     | p.L237P           | No                    |
| BCC222BUC      | 75  | 146           | T                    | C           | 75               | 1.65         | Non-Coding |                   | Yes                   |
| BCC222BUC      | 75  | 189           | A                    | G           | 39               | 0.8          | Non-Coding |                   | Yes                   |
| BCC222BUC      | 75  | 215           | A                    | G           | 38               | 0.85         | Non-Coding |                   | Yes                   |
| BCC244 BUC     | 23  | 295           | T (Germline Ref)     | C           | 20               | 1.15         | Non-Coding |                   | Yes                   |
| BCC244 BUC     | 23  | 3991          | A                    | G           | 18               | 0.81         | MT-ND1     | p.T229A           | No                    |
| BCC244 BUC     | 23  | 7028          | T (Germline Ref)     | C           | 21               | 0.81         | MT-CO1     | Silent            | Yes                   |
| BCC244 BUC     | 23  | 9633          | T                    | C           | 13               | 0.91         | MT-CO3     | p.S143P           | Yes                   |
| BCC260 BUC     | 71  | 234           | A                    | G           | 75               | 4.03         | Non-Coding |                   | Yes                   |
| BCC260 BUC     | 71  | 7028          | T (Germline Ref)     | C           | 23               | 0.82         | MT-CO1     | Silent            | Yes                   |
| BCC260 BUC     | 71  | 9029          | A                    | G           | 18               | 0.93         | MT-ATP6    | p.H168R           | Yes                   |
| BCC260 BUC     | 71  | 12007         | A (Germline Ref)     | G           | 34               | 1.37         | MT-ND4     | Silent            | Yes                   |
| BCC260 BUC     | 71  | 13969         | A                    | G           | 16               | 0.98         | MT-ND5     | p.S545G           | No                    |
| BCC260 BUC     | 71  | 15281         | T                    | C           | 16               | 0.85         | MT-CYB     | p.F179L           | No                    |
| BCC260 BUC     | 71  | 16129         | A (Germline Ref)     | G           | 41               | 1.48         | Non-Coding |                   | Yes                   |
| BCC260 BUC     | 71  | 16390         | A (Germline Ref)     | G           | 22               | 1.09         | Non-Coding |                   | Yes                   |
| BCC260 BUC     | 71  | 16486         | A                    | G           | 12               | 0.85         | Non-Coding |                   | No                    |
| BCC265 BUC     | 73  | 204           | T                    | C           | 9                | 0.9          | Non-Coding |                   | Yes                   |
| BCC265 BUC     | 73  | 6371          | T (Germline Ref)     | C           | 26               | 1.15         | MT-CO1     | Silent            | Yes                   |
| BCC265 BUC     | 73  | 7028          | T (Germline Ref)     | C           | 21               | 0.82         | MT-CO1     | Silent            | Yes                   |
| BCC265 BUC     | 73  | 15454         | T                    | C           | 16               | 0.83         | MT-CYB     | Silent            | Yes                   |
| BCC265 BUC     | 73  | 16223         | T (Germline Ref)     | C           | 12               | 1.03         | Non-Coding |                   | Yes                   |
| BCC266 BUC     | 74  | 7028          | T (Germline Ref)     | C           | 24               | 0.89         | MT-CO1     | Silent            | Yes                   |
| BCC266 BUC     | 74  | 12880         | T                    | C           | 22               | 0.8          | MT-ND5     | p.F182L           | Yes                   |
| BCC266 BUC     | 74  | 13935         | A                    | G           | 16               | 0.81         | MT-ND5     | Silent            | No                    |
| BCC266 BUC     | 74  | 16290         | C                    | T           | 10               | 0.87         | Non-Coding |                   | Yes                   |
