# Supplementary material for: Clonal Expansion of Early to Mid-Life Mitochondrial DNA Point Mutations Drives Mitochondrial Dysfunction during Human Ageing
Source: PubMed Central journal article supplement (PMC4169240; doi:10.1371/journal.pgen.1004620), 2014-09-18
Supplement: pgen.1004620.s006.pdf [file pgen.1004620.s006.pdf]

**Table S5:** MtDNA variants detected in the cloned mtDNA plasmid control.

The variants highlighted in red were also detected in all of the colon and buccal samples and were therefore excluded from the analysis in all cases

No variants were detected >0.64%.

rCRS: Revised Cambridge Reference Sequence

| Base Position | Reference Base (rCRS) | Base Change | Coverage | Quality Score | Variant Frequency | Variant Heteroplasmy |
|---------------|-----------------------|-------------|----------|---------------|-------------------|----------------------|
| 108           | A                     | G           | 52700    | 27.5          | 161               | 0.31                 |
| 152           | C (Germline Ref)      | T           | 61695    | 35.9          | 87                | 0.14                 |
| 172           | T                     | C           | 61993    | 27.7          | 192               | 0.31                 |
| 175           | A                     | G           | 61923    | 36.4          | 193               | 0.31                 |
| 183           | A                     | G           | 60372    | 22.3          | 194               | 0.32                 |
| 223           | T                     | C           | 46791    | 31            | 162               | 0.35                 |
| 263           | G (Germline Ref)      | A           | 36164    | 34.9          | 67                | 0.19                 |
| 270           | A                     | G           | 34129    | 26.9          | 118               | 0.35                 |
| 272           | A                     | G           | 33177    | 24.8          | 110               | 0.33                 |
| 567           | A                     | G           | 12588    | 24.4          | 49                | 0.39                 |
| 588           | T                     | C           | 17555    | 22.7          | 54                | 0.31                 |
| 608           | A                     | G           | 24101    | 31.2          | 77                | 0.32                 |
| 659           | T                     | C           | 38321    | 20.3          | 129               | 0.34                 |
| 678           | T                     | C           | 47106    | 28.4          | 144               | 0.31                 |
| 721           | T                     | C           | 59507    | 29.1          | 227               | 0.38                 |
| 723           | A                     | G           | 59968    | 21.1          | 192               | 0.32                 |
| 735           | A                     | G           | 62042    | 34.8          | 199               | 0.32                 |
| 750           | G (Germline Ref)      | A           | 66481    | 31.2          | 852               | 1.28                 |
| 753           | A                     | G           | 65823    | 31.4          | 251               | 0.38                 |
| 758           | T                     | C           | 65818    | 25.7          | 231               | 0.35                 |
| 760           | A                     | G           | 65797    | 31.5          | 224               | 0.34                 |
| 776           | A                     | G           | 65882    | 31.3          | 279               | 0.42                 |
| 819           | A                     | G           | 65796    | 30            | 225               | 0.34                 |
| 827           | A                     | G           | 65943    | 24.1          | 252               | 0.38                 |
| 879           | T                     | C           | 65990    | 24.6          | 360               | 0.55                 |
| 888           | T                     | C           | 65834    | 29.8          | 273               | 0.41                 |
| 905           | A                     | G           | 65760    | 24.7          | 205               | 0.31                 |
| 907           | A                     | G           | 65813    | 29.3          | 255               | 0.39                 |

| Base Position | Reference Base (rCRS) | Base Change | Coverage | Quality Score | Variant Frequency | Variant Heteroplasmy |
|---------------|-----------------------|-------------|----------|---------------|-------------------|----------------------|
| 921           | T                     | C           | 65815    | 33.1          | 247               | 0.38                 |
| 929           | A                     | G           | 65929    | 28.1          | 256               | 0.39                 |
| 942           | A                     | G           | 65827    | 33            | 276               | 0.42                 |
| 980           | T                     | C           | 44741    | 23.5          | 167               | 0.37                 |
| 1010          | A                     | G           | 60464    | 23.8          | 233               | 0.39                 |
| 1019          | A                     | G           | 62734    | 29.2          | 219               | 0.35                 |
| 1033          | T                     | C           | 65751    | 32.4          | 203               | 0.31                 |
| 1051          | A                     | G           | 65841    | 36.9          | 285               | 0.43                 |
| 1063          | A                     | G           | 65787    | 31.2          | 208               | 0.32                 |
| 1101          | T                     | C           | 65807    | 28.3          | 215               | 0.33                 |
| 1107          | T                     | C           | 65919    | 22.7          | 328               | 0.5                  |
| 1132          | T                     | C           | 65809    | 23.4          | 233               | 0.35                 |
| 1139          | A                     | G           | 65796    | 33.4          | 245               | 0.37                 |
| 1142          | A                     | G           | 65852    | 30.5          | 287               | 0.44                 |
| 1164          | T                     | C           | 65826    | 25.1          | 264               | 0.4                  |
| 1229          | T                     | C           | 65810    | 26.2          | 232               | 0.35                 |
| 1237          | A                     | G           | 65764    | 34.3          | 213               | 0.32                 |
| 1269          | T                     | C           | 65810    | 26.2          | 257               | 0.39                 |
| 1272          | A                     | G           | 65769    | 24.8          | 203               | 0.31                 |
| 1286          | A                     | G           | 65793    | 25.6          | 237               | 0.36                 |
| 1287          | A                     | G           | 66656    | 25.7          | 257               | 0.39                 |
| 1306          | A                     | G           | 65878    | 32.8          | 251               | 0.38                 |
| 1329          | T                     | C           | 65894    | 24.7          | 290               | 0.44                 |
| 1338          | A                     | G           | 65819    | 28.9          | 231               | 0.35                 |
| 1349          | T                     | C           | 65861    | 26.9          | 281               | 0.43                 |
| 1384          | A                     | G           | 67571    | 28.8          | 232               | 0.34                 |
| 1423          | A                     | G           | 65790    | 27.2          | 237               | 0.36                 |
| 1446          | A                     | G           | 65925    | 31.6          | 337               | 0.51                 |
| 1492          | A                     | G           | 65755    | 24            | 203               | 0.31                 |
| 1509          | T                     | C           | 65775    | 33.7          | 217               | 0.33                 |
| 1530          | A                     | G           | 64139    | 32.7          | 193               | 0.3                  |
| 1555          | A                     | G           | 59938    | 24.9          | 215               | 0.36                 |
| 1557          | A                     | G           | 59958    | 30.9          | 180               | 0.3                  |
| 1587          | T                     | C           | 52702    | 22.6          | 190               | 0.36                 |

| Base Position | Reference Base (rCRS) | Base Change | Coverage | Quality Score | Variant Frequency | Variant Heteroplasmy |
|---------------|-----------------------|-------------|----------|---------------|-------------------|----------------------|
| 1590          | A                     | G           | 51662    | 33.2          | 223               | 0.43                 |
| 1670          | A                     | G           | 31965    | 33.8          | 153               | 0.48                 |
| 1761          | A                     | G           | 31368    | 32.4          | 96                | 0.31                 |
| 1777          | A                     | G           | 34125    | 26.9          | 123               | 0.36                 |
| 1887          | A                     | G           | 56687    | 28.9          | 250               | 0.44                 |
| 1900          | A                     | G           | 58928    | 33.5          | 238               | 0.4                  |
| 1914          | A                     | G           | 63445    | 32.7          | 265               | 0.42                 |
| 1917          | A                     | G           | 63067    | 34.2          | 200               | 0.32                 |
| 1931          | A                     | G           | 65832    | 25.9          | 222               | 0.34                 |
| 1940          | A                     | G           | 65815    | 21.6          | 257               | 0.39                 |
| 1986          | A                     | G           | 65820    | 31            | 256               | 0.39                 |
| 1991          | A                     | G           | 65790    | 35.6          | 234               | 0.36                 |
| 2035          | T                     | C           | 65796    | 27.3          | 218               | 0.33                 |
| 2106          | A                     | G           | 61596    | 31.4          | 189               | 0.31                 |
| 2109          | A                     | T           | 60863    | 28.9          | 162               | 0.27                 |
| 2110          | A                     | AT          | 60647    | 29.6          | 223               | 0.37                 |
| 2112          | A                     | G           | 60310    | 30.9          | 204               | 0.34                 |
| 2115          | T                     | C           | 60438    | 29.8          | 232               | 0.38                 |
| 2148          | A                     | G           | 52878    | 23.5          | 242               | 0.46                 |
| 2184          | A                     | G           | 46422    | 20.5          | 153               | 0.33                 |
| 2208          | A                     | G           | 43318    | 31.2          | 137               | 0.32                 |
| 2214          | A                     | G           | 42531    | 29.3          | 138               | 0.32                 |
| 2216          | A                     | G           | 42357    | 29            | 158               | 0.37                 |
| 2260          | A                     | G           | 41359    | 23.3          | 185               | 0.45                 |
| 2270          | A                     | G           | 41833    | 21.7          | 150               | 0.36                 |
| 2327          | T                     | C           | 43227    | 21            | 155               | 0.36                 |
| 2365          | T                     | C           | 43328    | 29            | 165               | 0.38                 |
| 2367          | A                     | G           | 43298    | 34.1          | 164               | 0.38                 |
| 2369          | A                     | G           | 43637    | 31.2          | 145               | 0.33                 |
| 2422          | T                     | C           | 50469    | 27            | 218               | 0.43                 |
| 2424          | A                     | G           | 51254    | 33.1          | 174               | 0.34                 |
| 2432          | A                     | G           | 52949    | 33.2          | 179               | 0.34                 |
| 2442          | T                     | C           | 53658    | 28.3          | 228               | 0.42                 |
| 2510          | T                     | C           | 65829    | 22.8          | 228               | 0.35                 |

| Base Position | Reference Base (rCRS) | Base Change | Coverage | Quality Score | Variant Frequency | Variant Heteroplasmy |
|---------------|-----------------------|-------------|----------|---------------|-------------------|----------------------|
| 2512          | A                     | C           | 65832    | 32.9          | 276               | 0.42                 |
| 2515          | T                     | C           | 65797    | 32.7          | 218               | 0.33                 |
| 2552          | T                     | C           | 65780    | 32.3          | 228               | 0.35                 |
| 2554          | A                     | G           | 65994    | 29            | 341               | 0.52                 |
| 2609          | T                     | C           | 65786    | 28            | 236               | 0.36                 |
| 2632          | A                     | G           | 65808    | 29.1          | 235               | 0.36                 |
| 2649          | T                     | C           | 65931    | 24.2          | 248               | 0.38                 |
| 2651          | A                     | G           | 65982    | 29.5          | 363               | 0.55                 |
| 2654          | T                     | C           | 66002    | 30.9          | 397               | 0.6                  |
| 2656          | T                     | C           | 66034    | 29.8          | 383               | 0.58                 |
| 2658          | T                     | C           | 65934    | 29.8          | 343               | 0.52                 |
| 2660          | T                     | C           | 65901    | 29.9          | 327               | 0.5                  |
| 2664          | T                     | C           | 65904    | 28.8          | 319               | 0.48                 |
| 2674          | T                     | C           | 65763    | 30.9          | 211               | 0.32                 |
| 2682          | A                     | G           | 66061    | 28.4          | 423               | 0.64                 |
| 2685          | T                     | C           | 65869    | 20.5          | 244               | 0.37                 |
| 2717          | A                     | G           | 65951    | 30.8          | 346               | 0.52                 |
| 2720          | A                     | G           | 65792    | 20.3          | 237               | 0.36                 |
| 2722          | A                     | G           | 65798    | 29.2          | 242               | 0.37                 |
| 2723          | A                     | G           | 65961    | 23            | 258               | 0.39                 |
| 2725          | A                     | G           | 65905    | 28.2          | 330               | 0.5                  |
| 2737          | T                     | C           | 65819    | 30.3          | 253               | 0.38                 |
| 2775          | A                     | G           | 65935    | 23.8          | 296               | 0.45                 |
| 2830          | A                     | G           | 65931    | 21.3          | 273               | 0.41                 |
| 2833          | A                     | G           | 65896    | 25.9          | 222               | 0.34                 |
| 2854          | T                     | C           | 65823    | 33            | 244               | 0.37                 |
| 2863          | T                     | C           | 65880    | 23.8          | 299               | 0.45                 |
| 2864          | T                     | C           | 66692    | 32.2          | 260               | 0.39                 |
| 2866          | A                     | G           | 65814    | 24.8          | 252               | 0.38                 |
| 2879          | A                     | G           | 65759    | 33.5          | 204               | 0.31                 |
| 2880          | A                     | G           | 65918    | 32.1          | 273               | 0.41                 |
| 2885          | T                     | C           | 65794    | 21.8          | 221               | 0.34                 |
| 2910          | A                     | G           | 65911    | 24.8          | 274               | 0.42                 |
| 2921          | A                     | G           | 65898    | 31.3          | 329               | 0.5                  |

| Base Position | Reference Base (rCRS) | Base Change | Coverage | Quality Score | Variant Frequency | Variant Heteroplasmy |
|---------------|-----------------------|-------------|----------|---------------|-------------------|----------------------|
| 2922          | A                     | G           | 65887    | 24.6          | 223               | 0.34                 |
| 2924          | T                     | C           | 65817    | 30.5          | 259               | 0.39                 |
| 2938          | A                     | G           | 65955    | 25.9          | 268               | 0.41                 |
| 2940          | A                     | G           | 65831    | 23.3          | 235               | 0.36                 |
| 2947          | T                     | C           | 65854    | 28.6          | 270               | 0.41                 |
| 2950          | T                     | C           | 65769    | 27.8          | 198               | 0.3                  |
| 2960          | T                     | C           | 65926    | 28.7          | 297               | 0.45                 |
| 2987          | T                     | C           | 65902    | 20.5          | 320               | 0.49                 |
| 3000          | A                     | G           | 65962    | 27            | 336               | 0.51                 |
| 3006          | T                     | C           | 65827    | 23.5          | 239               | 0.36                 |
| 3010          | A                     | G           | 65887    | 35.5          | 164               | 0.25                 |
| 3018          | A                     | G           | 66065    | 29            | 423               | 0.64                 |
| 3037          | T                     | C           | 65762    | 29.9          | 202               | 0.31                 |
| 3041          | T                     | C           | 65836    | 34.7          | 292               | 0.44                 |
| 3045          | A                     | G           | 65871    | 23.9          | 204               | 0.31                 |
| 3052          | A                     | G           | 65839    | 33.2          | 230               | 0.35                 |
| 3055          | T                     | C           | 65967    | 20.1          | 257               | 0.39                 |
| 3062          | T                     | C           | 65928    | 34.3          | 362               | 0.55                 |
| 3065          | T                     | C           | 65816    | 26.3          | 243               | 0.37                 |
| 3067          | T                     | C           | 65898    | 20.7          | 310               | 0.47                 |
| 3069          | A                     | G           | 65839    | 32.1          | 279               | 0.42                 |
| 3102          | T                     | C           | 65829    | 33.4          | 262               | 0.4                  |
| 3133          | A                     | G           | 65797    | 34.4          | 227               | 0.35                 |
| 3135          | A                     | G           | 65845    | 36.7          | 280               | 0.43                 |
| 3136          | A                     | G           | 65903    | 20.8          | 218               | 0.33                 |
| 3138          | A                     | G           | 65826    | 34.7          | 268               | 0.41                 |
| 3282          | A                     | G           | 36984    | 20.9          | 116               | 0.31                 |
| 3304          | A                     | G           | 37152    | 25.6          | 113               | 0.3                  |
| 3611          | T                     | C           | 12861    | 24.6          | 39                | 0.3                  |
| 3628          | A                     | G           | 17192    | 28.5          | 52                | 0.3                  |
| 3669          | A                     | G           | 26930    | 23.3          | 109               | 0.4                  |
| 3708          | A                     | G           | 36464    | 22            | 121               | 0.33                 |
| 3760          | T                     | C           | 46362    | 34.3          | 150               | 0.32                 |
| 3805          | A                     | G           | 50654    | 23.7          | 164               | 0.32                 |

| Base Position | Reference Base (rCRS) | Base Change | Coverage | Quality Score | Variant Frequency | Variant Heteroplasmy |
|---------------|-----------------------|-------------|----------|---------------|-------------------|----------------------|
| 3818          | A                     | G           | 50477    | 29.7          | 169               | 0.33                 |
| 3883          | A                     | G           | 47101    | 28            | 160               | 0.34                 |
| 3902          | A                     | G           | 45768    | 34.7          | 622               | 1.36                 |
| 3904          | C                     | A           | 46054    | 34.7          | 548               | 1.19                 |
| 3906          | T                     | G           | 46076    | 30            | 92                | 0.2                  |
| 3908          | C                     | T           | 46430    | 34.7          | 630               | 1.36                 |
| 3917          | A                     | G           | 45522    | 35.4          | 173               | 0.38                 |
| 3929          | T                     | C           | 46342    | 21.5          | 194               | 0.42                 |
| 3931          | T                     | C           | 46661    | 26.2          | 156               | 0.33                 |
| 3937          | T                     | C           | 46539    | 31.7          | 144               | 0.31                 |
| 3991          | A                     | G           | 37500    | 27.5          | 157               | 0.42                 |
| 4049          | A                     | G           | 23729    | 30.8          | 104               | 0.44                 |
| 4072          | A                     | G           | 23608    | 30.4          | 86                | 0.36                 |
| 4087          | A                     | G           | 22706    | 31.7          | 91                | 0.4                  |
| 4154          | A                     | G           | 20861    | 21.7          | 71                | 0.34                 |
| 4166          | A                     | G           | 22498    | 25.8          | 68                | 0.3                  |
| 4220          | T                     | C           | 28860    | 24.6          | 94                | 0.33                 |
| 4283          | A                     | G           | 41919    | 20.6          | 131               | 0.31                 |
| 4297          | A                     | G           | 43340    | 27.5          | 131               | 0.3                  |
| 4340          | A                     | G           | 42763    | 34.4          | 166               | 0.39                 |
| 4388          | A                     | G           | 47737    | 21.1          | 209               | 0.44                 |
| 4520          | A                     | G           | 45636    | 26            | 184               | 0.4                  |
| 4525          | T                     | C           | 46306    | 28.5          | 184               | 0.4                  |
| 4527          | A                     | G           | 46870    | 26.9          | 159               | 0.34                 |
| 4543          | A                     | G           | 47545    | 32.2          | 158               | 0.33                 |
| 4557          | T                     | C           | 47959    | 34.8          | 147               | 0.31                 |
| 4586          | T                     | C           | 44854    | 29.7          | 191               | 0.43                 |
| 4622          | T                     | C           | 47381    | 30            | 157               | 0.33                 |
| 4653          | A                     | G           | 49383    | 23.6          | 149               | 0.3                  |
| 4721          | A                     | G           | 47674    | 33.7          | 154               | 0.32                 |
| 4801          | T                     | C           | 48275    | 36.3          | 154               | 0.32                 |
| 4866          | T                     | C           | 41338    | 24.8          | 125               | 0.3                  |
| 5376          | A                     | G           | 7460     | 28.2          | 25                | 0.34                 |
| 5474          | A                     | G           | 11533    | 23.8          | 37                | 0.32                 |

| Base Position | Reference Base (rCRS) | Base Change | Coverage | Quality Score | Variant Frequency | Variant Heteroplasmy |
|---------------|-----------------------|-------------|----------|---------------|-------------------|----------------------|
| 5539          | A                     | G           | 32270    | 32.4          | 133               | 0.41                 |
| 5589          | A                     | G           | 45457    | 30.1          | 153               | 0.34                 |
| 5594          | T                     | C           | 47276    | 28            | 191               | 0.4                  |
| 5630          | A                     | G           | 57776    | 28.5          | 214               | 0.37                 |
| 5732          | T                     | C           | 65996    | 30.5          | 317               | 0.48                 |
| 5734          | T                     | C           | 65911    | 32.8          | 305               | 0.46                 |
| 5785          | T                     | C           | 56967    | 36.8          | 218               | 0.38                 |
| 5814          | T                     | C           | 57777    | 28.2          | 190               | 0.33                 |
| 5816          | A                     | G           | 57782    | 35            | 202               | 0.35                 |
| 5836          | A                     | G           | 56841    | 32            | 226               | 0.4                  |
| 5848          | T                     | C           | 56349    | 31.6          | 225               | 0.4                  |
| 5850          | T                     | C           | 56416    | 34.2          | 178               | 0.32                 |
| 5873          | T                     | C           | 54105    | 35.2          | 183               | 0.34                 |
| 5904          | A                     | G           | 54705    | 33.7          | 175               | 0.32                 |
| 5907          | T                     | C           | 54666    | 34.8          | 177               | 0.32                 |
| 5921          | A                     | G           | 52742    | 32.1          | 214               | 0.41                 |
| 5944          | A                     | G           | 55143    | 30.7          | 186               | 0.34                 |
| 5978          | A                     | G           | 57319    | 30.4          | 250               | 0.44                 |
| 6040          | G (Germline Ref)      | A           | 66265    | 37.8          | 159               | 0.24                 |
| 6070          | T                     | C           | 65760    | 31.1          | 205               | 0.31                 |
| 6076          | T                     | C           | 65926    | 34.9          | 343               | 0.52                 |
| 6080          | A                     | G           | 65878    | 28.3          | 287               | 0.44                 |
| 6086          | T                     | C           | 65810    | 28.9          | 243               | 0.37                 |
| 6100          | T                     | C           | 65823    | 24.8          | 245               | 0.37                 |
| 6102          | T                     | C           | 65755    | 29            | 207               | 0.31                 |
| 6121          | T                     | C           | 65932    | 31.2          | 327               | 0.5                  |
| 6141          | A                     | G           | 65772    | 33.4          | 218               | 0.33                 |
| 6144          | T                     | C           | 65776    | 32.3          | 202               | 0.31                 |
| 6146          | A                     | G           | 65889    | 33.9          | 293               | 0.44                 |
| 6167          | T                     | C           | 65762    | 23.5          | 199               | 0.3                  |
| 6183          | T                     | C           | 65903    | 24.1          | 324               | 0.49                 |
| 6184          | T                     | C           | 65778    | 37.2          | 228               | 0.35                 |
| 6204          | A                     | G           | 65894    | 21.2          | 210               | 0.32                 |
| 6210          | T                     | C           | 65872    | 29.8          | 276               | 0.42                 |

| Base Position | Reference Base (rCRS) | Base Change | Coverage | Quality Score | Variant Frequency | Variant Heteroplasmy |
|---------------|-----------------------|-------------|----------|---------------|-------------------|----------------------|
| 6214          | T                     | C           | 65813    | 33.1          | 261               | 0.4                  |
| 6229          | T                     | C           | 65870    | 26.2          | 259               | 0.39                 |
| 6235          | T                     | C           | 65862    | 20.8          | 255               | 0.39                 |
| 6241          | T                     | C           | 65816    | 29.4          | 247               | 0.38                 |
| 6256          | T                     | C           | 65777    | 30.4          | 224               | 0.34                 |
| 6259          | A                     | G           | 65781    | 22.1          | 213               | 0.32                 |
| 6266          | A                     | G           | 65759    | 31.7          | 203               | 0.31                 |
| 6269          | A                     | G           | 65872    | 28.6          | 266               | 0.4                  |
| 6345          | T                     | C           | 32087    | 29.2          | 113               | 0.35                 |
| 6367          | T                     | C           | 31547    | 26.4          | 129               | 0.41                 |
| 6459          | T                     | C           | 24463    | 34.6          | 75                | 0.31                 |
| 6481          | T                     | C           | 28139    | 30.6          | 94                | 0.33                 |
| 6495          | T                     | C           | 29903    | 31.1          | 100               | 0.33                 |
| 6565          | A                     | G           | 34303    | 20.7          | 150               | 0.44                 |
| 6583          | A                     | G           | 42656    | 27.9          | 179               | 0.42                 |
| 6698          | A                     | G           | 64496    | 33            | 235               | 0.36                 |
| 6700          | A                     | G           | 64028    | 34.6          | 234               | 0.37                 |
| 6728          | A                     | G           | 65783    | 31            | 220               | 0.33                 |
| 6763          | T                     | C           | 65777    | 35.2          | 230               | 0.35                 |
| 6767          | A                     | G           | 65948    | 22.8          | 356               | 0.54                 |
| 6772          | A                     | G           | 65806    | 30.5          | 256               | 0.39                 |
| 6796          | A                     | G           | 65851    | 34.1          | 277               | 0.42                 |
| 6802          | A                     | G           | 65918    | 31.9          | 307               | 0.47                 |
| 6815          | T                     | C           | 65757    | 33.7          | 211               | 0.32                 |
| 6879          | A                     | G           | 65849    | 28.8          | 279               | 0.42                 |
| 6881          | A                     | G           | 65829    | 32.3          | 252               | 0.38                 |
| 6919          | T                     | C           | 65822    | 27            | 238               | 0.36                 |
| 6937          | T                     | C           | 65814    | 33.1          | 226               | 0.34                 |
| 6939          | T                     | C           | 65872    | 34.3          | 301               | 0.46                 |
| 6989          | A                     | G           | 65758    | 30            | 206               | 0.31                 |
| 7006          | A                     | G           | 65777    | 25.9          | 225               | 0.34                 |
| 7032          | T                     | C           | 65266    | 35            | 228               | 0.35                 |
| 7058          | T                     | C           | 60594    | 31.8          | 268               | 0.44                 |
| 7150          | T                     | C           | 61205    | 28.1          | 188               | 0.31                 |



| Base Position | Reference Base (rCRS) | Base Change | Coverage | Quality Score | Variant Frequency | Variant Heteroplasmy |
|---------------|-----------------------|-------------|----------|---------------|-------------------|----------------------|
| 7175          | T                     | C           | 56128    | 27.4          | 181               | 0.32                 |
| 7189          | A                     | G           | 55880    | 31.1          | 195               | 0.35                 |
| 7263          | T                     | C           | 64703    | 28.5          | 230               | 0.36                 |
| 7275          | T                     | C           | 64554    | 33.5          | 215               | 0.33                 |
| 7286          | T                     | C           | 65798    | 31.3          | 239               | 0.36                 |
| 7324          | A                     | G           | 63743    | 32.6          | 246               | 0.39                 |
| 7344          | A                     | G           | 40496    | 27.2          | 128               | 0.32                 |
| 7445          | A                     | G           | 31340    | 33.8          | 114               | 0.36                 |
| 7480          | T                     | C           | 41807    | 29.9          | 158               | 0.38                 |
| 7507          | A                     | G           | 49198    | 34.5          | 159               | 0.32                 |
| 7545          | T                     | C           | 65779    | 35.1          | 229               | 0.35                 |
| 7594          | T                     | C           | 65886    | 31.4          | 283               | 0.43                 |
| 7597          | A                     | G           | 65914    | 24.7          | 289               | 0.44                 |
| 7617          | A                     | G           | 65816    | 29            | 238               | 0.36                 |
| 7848          | A                     | G           | 24224    | 30.6          | 89                | 0.37                 |
| 7856          | A                     | G           | 27043    | 27.6          | 106               | 0.39                 |
| 7901          | T                     | C           | 40230    | 29.1          | 139               | 0.35                 |
| 7980          | A                     | G           | 62344    | 28.7          | 212               | 0.34                 |
| 7983          | T                     | C           | 63564    | 25.6          | 221               | 0.35                 |
| 7987          | A                     | G           | 64003    | 29.3          | 224               | 0.35                 |
| 8001          | A                     | G           | 65888    | 31.4          | 281               | 0.43                 |
| 8008          | A                     | G           | 65859    | 23.6          | 251               | 0.38                 |
| 8025          | A                     | G           | 65797    | 21.8          | 249               | 0.38                 |
| 8058          | A                     | G           | 65924    | 27.1          | 297               | 0.45                 |
| 8067          | A                     | G           | 65831    | 28.7          | 274               | 0.42                 |
| 8069          | T                     | C           | 65852    | 36.2          | 298               | 0.45                 |
| 8074          | A                     | G           | 65858    | 32.9          | 280               | 0.43                 |
| 8077          | T                     | C           | 65946    | 23.1          | 314               | 0.48                 |
| 8103          | A                     | G           | 65822    | 27.5          | 258               | 0.39                 |
| 8146          | A                     | G           | 65868    | 23.6          | 300               | 0.46                 |
| 8200          | T                     | C           | 65865    | 35.9          | 294               | 0.45                 |
| 8531          | A                     | G           | 12891    | 22.5          | 50                | 0.39                 |
| 8653          | A                     | G           | 10377    | 27.7          | 40                | 0.39                 |
| 8725          | A                     | G           | 17113    | 27.8          | 64                | 0.37                 |

| Base Position | Reference Base (rCRS) | Base Change | Coverage | Quality Score | Variant Frequency | Variant Heteroplasmy |
|---------------|-----------------------|-------------|----------|---------------|-------------------|----------------------|
| 8733          | T                     | C           | 17907    | 23.4          | 60                | 0.34                 |
| 8795          | A                     | G           | 18803    | 21.3          | 72                | 0.38                 |
| 8860          | G (Germline Ref)      | A           | 17900    | 32.2          | 24                | 0.13                 |
| 8875          | T                     | C           | 16807    | 29            | 70                | 0.42                 |
| 8979          | T                     | C           | 4278     | 26.4          | 14                | 0.33                 |
| 9041          | A                     | G           | 11252    | 31.4          | 42                | 0.37                 |
| 9052          | A                     | G           | 13078    | 25.1          | 58                | 0.44                 |
| 9098          | T                     | C           | 20829    | 25.9          | 65                | 0.31                 |
| 9306          | T                     | C           | 54349    | 34            | 166               | 0.31                 |
| 9315          | T                     | C           | 55203    | 34.5          | 171               | 0.31                 |
| 9404          | A                     | G           | 59970    | 26.2          | 210               | 0.35                 |
| 9420          | A                     | G           | 54840    | 34.9          | 206               | 0.38                 |
| 9422          | A                     | G           | 53787    | 29.8          | 185               | 0.34                 |
| 9503          | A                     | G           | 44692    | 31.6          | 150               | 0.34                 |
| 9745          | A                     | G           | 65145    | 32.7          | 210               | 0.32                 |
| 9758          | T                     | C           | 65781    | 29.4          | 220               | 0.33                 |
| 9789          | T                     | C           | 65772    | 32.4          | 203               | 0.31                 |
| 9813          | T                     | C           | 65883    | 35.7          | 321               | 0.49                 |
| 9823          | T                     | C           | 65780    | 35            | 222               | 0.34                 |
| 9840          | T                     | C           | 65891    | 30.4          | 303               | 0.46                 |
| 9845          | T                     | C           | 65847    | 34.5          | 280               | 0.43                 |
| 9856          | T                     | C           | 65873    | 28.1          | 286               | 0.43                 |
| 9861          | T                     | C           | 65821    | 33.9          | 269               | 0.41                 |
| 9879          | T                     | C           | 65796    | 31.3          | 240               | 0.36                 |
| 9880          | T                     | C           | 65768    | 36.6          | 204               | 0.31                 |
| 9885          | T                     | C           | 65796    | 32.4          | 232               | 0.35                 |
| 9899          | T                     | C           | 65898    | 25.9          | 313               | 0.47                 |
| 9909          | T                     | C           | 65851    | 28            | 294               | 0.45                 |
| 9930          | T                     | C           | 65889    | 25            | 293               | 0.44                 |
| 9944          | T                     | C           | 65818    | 31.4          | 254               | 0.39                 |
| 9946          | T                     | C           | 65790    | 28.6          | 227               | 0.35                 |
| 9953          | A                     | G           | 65849    | 22.3          | 237               | 0.36                 |
| 9961          | T                     | C           | 65778    | 24.1          | 206               | 0.31                 |
| 9967          | T                     | C           | 65921    | 30.9          | 309               | 0.47                 |

| Base Position | Reference Base (rCRS) | Base Change | Coverage | Quality Score | Variant Frequency | Variant Heteroplasmy |
|---------------|-----------------------|-------------|----------|---------------|-------------------|----------------------|
| 9969          | T                     | C           | 65850    | 24            | 245               | 0.37                 |
| 9989          | T                     | C           | 65812    | 21.1          | 229               | 0.35                 |
| 10089         | A                     | G           | 49771    | 22.5          | 189               | 0.38                 |
| 10376         | A                     | G           | 52671    | 26.5          | 190               | 0.36                 |
| 10468         | A                     | C           | 65880    | 23.6          | 68                | 0.36                 |
| 10510         | T                     | C           | 63623    | 25.9          | 274               | 0.43                 |
| 10665         | T                     | C           | 31531    | 25.9          | 128               | 0.41                 |
| 10682         | A                     | G           | 33262    | 22.5          | 116               | 0.35                 |
| 10705         | T                     | C           | 33837    | 25.9          | 111               | 0.33                 |
| 10802         | A                     | G           | 26122    | 28.3          | 89                | 0.34                 |
| 10804         | A                     | G           | 25979    | 27.9          | 94                | 0.36                 |
| 10807         | A                     | G           | 25678    | 24.3          | 87                | 0.34                 |
| 10821         | A                     | G           | 23403    | 31.8          | 75                | 0.32                 |
| 11118         | T                     | C           | 36732    | 28.4          | 132               | 0.36                 |
| 11267         | A                     | G           | 29291    | 32.5          | 117               | 0.4                  |
| 11299         | T                     | C           | 33791    | 30.8          | 111               | 0.33                 |
| 11318         | T                     | C           | 36130    | 21.2          | 115               | 0.32                 |
| 11329         | A                     | G           | 37198    | 29.7          | 119               | 0.32                 |
| 11357         | A                     | G           | 39442    | 31.9          | 140               | 0.35                 |
| 11500         | A                     | G           | 34684    | 31.6          | 117               | 0.34                 |
| 11526         | A                     | G           | 25114    | 23            | 95                | 0.38                 |
| 11579         | T                     | C           | 31602    | 31            | 102               | 0.32                 |
| 11601         | A                     | G           | 35260    | 32.7          | 138               | 0.39                 |
| 11624         | T                     | C           | 37562    | 27.1          | 113               | 0.3                  |
| 11678         | T                     | C           | 43939    | 34.1          | 136               | 0.31                 |
| 11781         | T                     | C           | 52664    | 31.3          | 163               | 0.31                 |
| 11809         | T                     | C           | 50765    | 21.4          | 167               | 0.33                 |
| 12114         | A                     | G           | 50691    | 23.4          | 164               | 0.32                 |
| 12177         | A                     | G           | 61837    | 20.8          | 205               | 0.33                 |
| 12184         | A                     | G           | 62231    | 22.2          | 218               | 0.35                 |
| 12215         | T                     | C           | 63725    | 32            | 235               | 0.37                 |
| 12217         | A                     | G           | 64112    | 28.8          | 195               | 0.3                  |
| 12232         | T                     | C           | 62825    | 34.1          | 211               | 0.34                 |
| 12317         | T                     | C           | 31935    | 23.3          | 140               | 0.44                 |

| Base Position | Reference Base (rCRS) | Base Change | Coverage | Quality Score | Variant Frequency | Variant Heteroplasmy |
|---------------|-----------------------|-------------|----------|---------------|-------------------|----------------------|
| 12347         | A                     | G           | 20286    | 28.3          | 61                | 0.3                  |
| 12473         | T                     | C           | 19866    | 23.7          | 61                | 0.31                 |
| 12479         | T                     | C           | 20256    | 27.7          | 77                | 0.38                 |
| 12497         | T                     | C           | 22864    | 26.9          | 81                | 0.35                 |
| 12500         | T                     | C           | 23290    | 25.2          | 71                | 0.3                  |
| 12534         | A                     | G           | 26836    | 31.2          | 118               | 0.44                 |
| 12536         | A                     | G           | 26965    | 20.5          | 110               | 0.41                 |
| 12540         | A                     | G           | 27355    | 32            | 123               | 0.45                 |
| 12631         | T                     | C           | 51167    | 31.3          | 174               | 0.34                 |
| 12654         | A                     | G           | 56477    | 30.1          | 183               | 0.32                 |
| 12757         | T                     | C           | 65857    | 33.7          | 307               | 0.47                 |
| 12766         | T                     | C           | 65798    | 27.5          | 223               | 0.34                 |
| 12793         | T                     | C           | 65786    | 28.9          | 223               | 0.34                 |
| 12807         | A                     | G           | 65824    | 34.2          | 243               | 0.37                 |
| 12810         | A                     | G           | 65814    | 24.1          | 211               | 0.32                 |
| 12834         | A                     | G           | 65778    | 26.3          | 200               | 0.3                  |
| 12924         | A                     | G           | 46903    | 32.2          | 165               | 0.35                 |
| 13057         | A                     | G           | 23521    | 30.8          | 87                | 0.37                 |
| 13254         | T                     | C           | 37953    | 27.9          | 123               | 0.32                 |
| 13260         | T                     | C           | 37466    | 27.5          | 122               | 0.33                 |
| 13262         | A                     | G           | 37605    | 34.7          | 119               | 0.32                 |
| 13304         | A                     | G           | 34880    | 28.4          | 117               | 0.34                 |
| 13363         | T                     | C           | 39453    | 27.9          | 144               | 0.36                 |
| 13373         | T                     | C           | 39040    | 21.4          | 122               | 0.31                 |
| 13441         | A                     | G           | 36839    | 31.8          | 118               | 0.32                 |
| 13540         | T                     | C           | 24359    | 22.8          | 82                | 0.34                 |
| 13572         | T                     | C           | 23484    | 20.4          | 76                | 0.32                 |
| 13591         | A                     | G           | 23182    | 27.3          | 82                | 0.35                 |
| 13799         | T                     | C           | 15298    | 28.5          | 53                | 0.35                 |
| 13812         | T                     | C           | 17259    | 22.7          | 52                | 0.3                  |
| 13814         | T                     | C           | 17340    | 24.1          | 55                | 0.32                 |
| 14007         | A                     | G           | 11095    | 27.3          | 35                | 0.32                 |
| 14065         | A                     | G           | 12998    | 26            | 41                | 0.32                 |
| 14093         | T                     | C           | 13889    | 26.3          | 51                | 0.37                 |

| Base Position | Reference Base (rCRS) | Base Change | Coverage | Quality Score | Variant Frequency | Variant Heteroplasmy |
|---------------|-----------------------|-------------|----------|---------------|-------------------|----------------------|
| 14110         | T                     | C           | 14545    | 21.7          | 45                | 0.31                 |
| 14679         | T                     | C           | 10920    | 25.6          | 41                | 0.38                 |
| 14692         | A                     | G           | 11440    | 26.3          | 50                | 0.44                 |
| 14723         | T                     | C           | 12370    | 30.1          | 43                | 0.35                 |
| 14743         | A                     | G           | 10761    | 22.9          | 36                | 0.33                 |
| 14851         | A                     | G           | 17188    | 24.1          | 60                | 0.35                 |
| 14853         | T                     | C           | 18115    | 31            | 60                | 0.33                 |
| 14919         | A                     | G           | 35491    | 23.5          | 116               | 0.33                 |
| 14939         | T                     | C           | 43442    | 33.4          | 142               | 0.33                 |
| 14961         | A                     | G           | 49703    | 24.3          | 211               | 0.42                 |
| 15023         | T                     | C           | 65804    | 22.9          | 229               | 0.35                 |
| 15069         | T                     | C           | 65784    | 26.4          | 226               | 0.34                 |
| 15074         | T                     | C           | 65765    | 31.1          | 217               | 0.33                 |
| 15099         | T                     | C           | 65777    | 20.1          | 213               | 0.32                 |
| 15161         | T                     | C           | 65822    | 34.7          | 247               | 0.38                 |
| 15178         | A                     | G           | 65839    | 27            | 248               | 0.38                 |
| 15204         | T                     | C           | 65791    | 21.8          | 202               | 0.31                 |
| 15220         | A                     | G           | 65767    | 21.7          | 205               | 0.31                 |
| 15222         | A                     | G           | 65802    | 29.5          | 232               | 0.35                 |
| 15293         | T                     | C           | 35731    | 32.4          | 124               | 0.35                 |
| 15299         | T                     | C           | 34482    | 27.6          | 109               | 0.32                 |
| 15325         | A                     | G           | 27765    | 30.6          | 133               | 0.48                 |
| 15326         | G (Germline Ref)      | A           | 27077    | 33.4          | 34                | 0.13                 |
| 15344         | T                     | C           | 24802    | 27.2          | 84                | 0.34                 |
| 15766         | A                     | G           | 62054    | 31.5          | 198               | 0.32                 |
| 15768         | A                     | G           | 62806    | 27.3          | 226               | 0.36                 |
| 15852         | T                     | C           | 65817    | 27.1          | 251               | 0.38                 |
| 15889         | T                     | C           | 65807    | 31.1          | 228               | 0.35                 |
| 15911         | A                     | G           | 65766    | 35            | 215               | 0.33                 |
| 15916         | T                     | C           | 65842    | 34.7          | 267               | 0.41                 |
| 15918         | T                     | C           | 65856    | 32            | 278               | 0.42                 |
| 15934         | A                     | G           | 65817    | 30.3          | 232               | 0.35                 |
| 15935         | A                     | G           | 65786    | 37            | 233               | 0.35                 |
| 15936         | A                     | G           | 65766    | 36.3          | 203               | 0.31                 |

| Base Position | Reference Base (rCRS) | Base Change | Coverage | Quality Score | Variant Frequency | Variant Heteroplasmy |
|---------------|-----------------------|-------------|----------|---------------|-------------------|----------------------|
| 15958         | A                     | G           | 65879    | 31.1          | 276               | 0.42                 |
| 15960         | A                     | G           | 65831    | 29.2          | 266               | 0.4                  |
| 15976         | T                     | C           | 65789    | 32.4          | 223               | 0.34                 |
| 15999         | A                     | G           | 65832    | 32.6          | 216               | 0.33                 |
| 16017         | T                     | C           | 65784    | 27.3          | 238               | 0.36                 |
| 16020         | T                     | C           | 65847    | 31.1          | 286               | 0.43                 |
| 16025         | T                     | C           | 65900    | 28.9          | 258               | 0.39                 |
| 16027         | T                     | C           | 65834    | 28.9          | 275               | 0.42                 |
| 16031         | A                     | G           | 65773    | 24.6          | 200               | 0.3                  |
| 16075         | T                     | C           | 65786    | 24.9          | 199               | 0.3                  |
| 16105         | T                     | C           | 56501    | 31.5          | 174               | 0.31                 |
| 16486         | A                     | G           | 39775    | 25.1          | 131               | 0.33                 |
| 16487         | A                     | G           | 39644    | 26.8          | 135               | 0.34                 |
| 16519         | C (Germline Ref)      | T           | 29217    | 28.6          | 45                | 0.15                 |
