# Supplementary material for: Clonal Expansion of Early to Mid-Life Mitochondrial DNA Point Mutations Drives Mitochondrial Dysfunction during Human Ageing
Source: PLoS Genet. 2014 Sep 18;10(9):e1004620. doi: 10.1371/journal.pgen.1004620 (PMC4169240; doi:10.1371/journal.pgen.1004620)
Supplement: Table S4 — Validation of the sensitivity and specificity of the RMC assay. (PDF) [file pgen.1004620.s005.pdf]

| Expected number of mutant copies per PCR reaction | Expected mutation frequency | Average observed mutation frequency (n=3)     |
|---------------------------------------------------|-----------------------------|-----------------------------------------------|
| 10                                                | $4 \times 10^{-3}$          | $4.00 \times 10^{-3} \pm 0$                   |
| 1                                                 | $4 \times 10^{-4}$          | $3.69 \times 10^{-4} \pm 4.8 \times 10^{-5}$  |
| 0.1                                               | $4 \times 10^{-5}$          | $4.27 \times 10^{-5} \pm 2.0 \times 10^{-5}$  |
| 0.01                                              | $4 \times 10^{-6}$          | $4.33 \times 10^{-6} \pm 5.13 \times 10^{-6}$ |

**Table S4:** Validation of the sensitivity and specificity of the RMC assay. Wild-type and mutant clones were mixed in known concentrations and the RMC assay carried out. This was done on 3 separate occasions. The observed mtDNA mutation frequencies were compared to the expected mtDNA mutation frequencies. There was no significant difference between the observed and expected frequencies (p=0.99 chi-squared test).
